# Supplementary material for: miR-185 Plays an Anti-Hypertrophic Role in the Heart via Multiple Targets in the Calcium-Signaling Pathways
Source: PLoS One. 2015 Mar 13;10(3):e0122509. doi: 10.1371/journal.pone.0122509 (PMC4358957; doi:10.1371/journal.pone.0122509)
Supplement: S1 Table — (XLSX) [file pone.0122509.s002.xlsx]

## Sheet: Heart-expressed miRNAs
Heart-expressed miRNAs (143)
mmu-let-7a
mmu-let-7b
mmu-let-7c
mmu-let-7d
mmu-let-7e
mmu-let-7f
mmu-let-7g
mmu-let-7h
mmu-let-7i
mmu-let-7j
mmu-miR-1
mmu-miR-100
mmu-miR-101
mmu-miR-103
mmu-miR-106a
mmu-miR-107
mmu-miR-10a
mmu-miR-10b
mmu-miR-125a
mmu-miR-125b
mmu-miR-126-3p
mmu-miR-126-5p
mmu-miR-127
mmu-miR-130a
mmu-miR-132
mmu-miR-133a
mmu-miR-133b
mmu-miR-139
mmu-miR-140
mmu-miR-142-3p
mmu-miR-143
mmu-miR-144
mmu-miR-145
mmu-miR-146a
mmu-miR-146b
mmu-miR-148a
mmu-miR-149
mmu-miR-150
mmu-miR-151
mmu-miR-152
mmu-miR-153
mmu-miR-154
mmu-miR-155
mmu-miR-15a
mmu-miR-15b
mmu-miR-16
mmu-miR-17-3p
mmu-miR-17-5p
mmu-miR-181a
mmu-miR-181b
mmu-miR-184
mmu-miR-185
mmu-miR-188
mmu-miR-18b
mmu-miR-191
mmu-miR-194
mmu-miR-195
mmu-miR-199a-3p
mmu-miR-199a-5p
mmu-miR-199b
mmu-miR-19a
mmu-miR-19b
mmu-miR-200a
mmu-miR-208
mmu-miR-208a
mmu-miR-20a
mmu-miR-20b
mmu-miR-21
mmu-miR-210
mmu-miR-211
mmu-miR-214
mmu-miR-215
mmu-miR-217
mmu-miR-218
mmu-miR-22
mmu-miR-221
mmu-miR-222
mmu-miR-223
mmu-miR-224
mmu-miR-23a
mmu-miR-23b
mmu-miR-24
mmu-miR-25
mmu-miR-26
mmu-miR-26a
mmu-miR-26b
mmu-miR-27a
mmu-miR-27b
mmu-miR-28
mmu-miR-292-3p
mmu-miR-295
mmu-miR-297
mmu-miR-29a
mmu-miR-29b
mmu-miR-29c
mmu-miR-30a-3p
mmu-miR-30a-5p
mmu-miR-30b
mmu-miR-30c
mmu-miR-30d
mmu-miR-30e-3p
mmu-miR-30e-5p
mmu-miR-31
mmu-miR-320
mmu-miR-322
mmu-miR-324-5p
mmu-miR-330
mmu-miR-335-5p
mmu-miR-337
mmu-miR-341
mmu-miR-342
mmu-miR-34a
mmu-miR-351
mmu-miR-361
mmu-miR-365
mmu-miR-374
mmu-miR-377
mmu-miR-378
mmu-miR-379
mmu-miR-422a
mmu-miR-423
mmu-miR-451
mmu-miR-483
mmu-miR-484
mmu-miR-486
mmu-miR-494
mmu-miR-497
mmu-miR-499
mmu-miR-574-5p
mmu-miR-690
mmu-miR-7
mmu-miR-705
mmu-miR-709
mmu-miR-711
mmu-miR-720
mmu-miR-762
mmu-miR-805
mmu-miR-9
mmu-miR-92b
mmu-miR-93
mmu-miR-98
mmu-miR-99a
mmu-miR-99b
Heart-expressed miRNA familes (97)	Family conservation
let-7/98	highly conserved
miR-1/206	highly conserved
miR-10	highly conserved
miR-101	highly conserved
miR-103/107	highly conserved
miR-106/302	highly conserved
miR-125/351	highly conserved
miR-126/126-3p	highly conserved
miR-130/301	highly conserved
miR-132/212	highly conserved
miR-133	highly conserved
miR-139-5p	highly conserved
miR-140/140-5p/876-3p	highly conserved
miR-141/200a	highly conserved
miR-142-3p	highly conserved
miR-143	highly conserved
miR-144	highly conserved
miR-145	highly conserved
miR-146	highly conserved
miR-148/152	highly conserved
miR-15/16/195/424/497	highly conserved
miR-150	highly conserved
miR-153	highly conserved
miR-155	highly conserved
miR-17-5p/20/93.mr/106/519.d	highly conserved
miR-181	highly conserved
miR-184	highly conserved
miR-18ab	highly conserved
miR-19	highly conserved
miR-191	highly conserved
miR-192/215	highly conserved
miR-194	highly conserved
miR-199/199-5p	highly conserved
miR-204/211	highly conserved
miR-208/208ab	highly conserved
miR-21/590-5p	highly conserved
miR-210	highly conserved
miR-214/761	highly conserved
miR-217	highly conserved
miR-218	highly conserved
miR-22	highly conserved
miR-221/222	highly conserved
miR-223	highly conserved
miR-23ab	highly conserved
miR-24	highly conserved
miR-25/32/92/92ab/363/367	highly conserved
miR-26ab/1297	highly conserved
miR-27ab	highly conserved
miR-29abc	highly conserved
miR-30a/30a-5p/30b/30b-5p/30cde/384-5p	highly conserved
miR-31	highly conserved
miR-34a/34b-5p/34c/34c-5p/449/449abc/699	highly conserved
miR-365	highly conserved
miR-451	highly conserved
miR-499/499-5p	highly conserved
miR-7/7ab	highly conserved
miR-9	highly conserved
miR-99ab/100	highly conserved
miR-125a-3p	conserved
miR-127	conserved
miR-149	conserved
miR-154	conserved
miR-185/882	conserved
miR-224	conserved
miR-28/28-5p/708	conserved
miR-320/320abcd	conserved
miR-324-5p	conserved
miR-326/330/330-5p	conserved
miR-335/335-5p	conserved
miR-342/342-3p	conserved
miR-361/361-5p	conserved
miR-374/374ab	conserved
miR-377	conserved
miR-378/422a	conserved
miR-379	conserved
miR-486/486-5p	conserved
miR-494	conserved
miR-125b-3p	poorly conserved
miR-126/126-5p	poorly conserved
miR-151	poorly conserved
miR-188/188-5p	poorly conserved
miR-199/199-3p	poorly conserved
miR-290-3p/292-3p/467a	poorly conserved
miR-297/297a/297b-5p/297c	poorly conserved
miR-337/337-3p	poorly conserved
miR-341	poorly conserved
miR-344-5p/484	poorly conserved
miR-423/423-3p	poorly conserved
miR-483/483-5p	poorly conserved
miR-574-5p	poorly conserved
miR-690	poorly conserved
miR-705	poorly conserved
miR-709/1827	poorly conserved
miR-711	poorly conserved
miR-720.m	poorly conserved
miR-762	poorly conserved
miR-805	poorly conserved

## Sheet: Heart-expressed mRNAs
	Average(RPKM)				Average(Read count)
Cardiac-expressed mRNAs	Sedentary control (n=3)	Swim (n=4)	sham (n=3)	TAC (n=3)	Sedentary control (n=3)	Swim (n=4)	sham (n=3)	TAC (n=3)
0610007C21Rik	46.24	43.08	39.6833	38.4967	332.389	286.944	414.38	424.065
0610007L01Rik	13.3133	12.555	15.95	18.5367	408.667	356.25	709.935	871.917
0610007P08Rik	3.13	2.9	2.05	2.07333	71.3241	61	67.6667	72.3148
0610007P14Rik	4.2	4.3225	4.44667	5.88333	42.3333	40.5	65	91
0610007P22Rik	5.3	6.085	4.49	4.86667	52.3333	55.5	64.3333	73.6574
0610009B22Rik	14.59	12.54	15.1733	11.49	98.6667	78.7222	149.259	119
0610009D07Rik	14.1533	13.175	8.68	9.06667	134.333	115.25	119.657	132
0610009O20Rik	83.8633	93.2825	67.3767	40.1067	1706.6	1757.95	1991.58	1248.29
0610010F05Rik	2.84333	2.41	1.70667	2.04333	100.278	78.7014	87.3333	110.306
0610010K14Rik	16.8733	18.7725	19.8367	19.6867	111.333	114.75	190.333	199
0610010O12Rik	27.6433	35.7875	29.44	43.4867	140	167.5	216.333	337.667
0610011F06Rik	12.6233	13.25	8.75	7.71	85	82.75	85.3333	79.6667
0610011L14Rik	9.74	10.05	8.18667	7.87667	284	271.75	346	351.333
0610012G03Rik	48.3367	50.81	39.1533	37.7333	600	583.5	706.667	717
0610030E20Rik	4.96667	4.4975	2.36	2.41333	208	174.75	143.667	154.667
0610031J06Rik	20.1	21.34	20.8667	29.0433	262.991	258	396	582.667
0610037L13Rik	19.8667	18.005	14.28	14.2233	262.194	219.931	273.861	287.824
0610037P05Rik	33.0733	31.235	19.6067	18.3833	400	350.243	344.657	340.657
0610040J01Rik	1.94	1.9425	2.85667	1.13333	33	30.75	70.6667	29.6667
0910001L09Rik	65.06	76.67	66.0867	70.32	349.954	381.729	516.926	579.88
1110001J03Rik	170.8	176.503	128.05	74.4933	641	613.5	698.333	428
1110002B05Rik	20.8233	18.0375	12.8767	12.3967	241.667	193.986	216.963	220.287
1110002N22Rik	13.2867	12.325	10.0367	8.28667	145.667	125	159.667	138.991
1110003E01Rik	29.0567	28.1325	21.6133	21.0267	490.602	440.125	529.815	544.407
1110004E09Rik	14.06	14.2925	14.28	12.1733	132.333	124.229	194.972	175.333
1110004F10Rik	15.78	14.5325	18.9467	17.5833	188	160.25	327.333	321.324
1110005A03Rik	14.93	11.8375	8.67333	5.88667	120.667	88.5	101.667	72.6667
1110007A13Rik	9.42667	8.6025	6.89	7.85	334.667	282.75	354.981	426.981
1110007C09Rik	73.53	75.98	76.3133	66.25	503.324	480.972	758.991	695.296
1110008F13Rik	42.73	43.615	56.4467	62.31	188.62	177.653	362.037	421.5
1110008J03Rik	5.85	6.7575	7.70333	5.78	77	82.75	147.333	116.667
1110008L16Rik	2.65667	2.74	2.16333	2.03	57	54.25	67.3333	66.6667
1110008P14Rik	25.6067	31.475	19.32	24.1367	134.963	152.979	147.667	194.991
1110012D08Rik	5.2	3.8325	4.08	5.97333	103.324	70.75	117.667	182
1110012L19Rik	7.29667	8.655	5.89	5.25333	65.6667	72.25	77	72.3333
1110014N23Rik	9.06333	10.995	11.34	12.23	202.324	227.25	367	418.648
1110018G07Rik	21.2667	17.575	19.42	12.3133	905.667	692.743	1199.31	801.324
1110018J18Rik	22.5167	21.6425	15.8033	10.4133	186.324	165.729	189.667	132
1110020G09Rik	25.3967	24.4325	23.3967	11.85	547.648	488.5	731.667	390.972
1110021L09Rik	2.23333	1.8475	2.19	1.74333	53.9907	41.5	76.6481	64.3241
1110028C15Rik	5.87	6.85	3.89333	2.91667	200.667	216.743	192.991	152.657
1110031I02Rik	13.1733	15.3775	15.9333	13.2667	139.333	150.743	244.333	214.667
1110032A03Rik	5.14667	4.735	4.31667	3.89333	78	66.2431	95	90.3333
1110032A13Rik	39.0633	41.1925	40.3967	30.0133	445.333	434	668.667	523.667
1110034A24Rik	2.19667	2.5725	1.63	1.72333	49.3333	53.5	53	59.3333
1110036O03Rik	30.7233	24.3325	24.2767	19.92	488.991	357.743	560.315	485.62
1110037F02Rik	4.75	4.8075	4.66667	5.59667	287.667	269.5	409.667	519.333
1110038D17Rik	16.87	17.425	14.0233	11.8367	417.972	399.5	505	448.667
1110038F14Rik	11.65	10.05	10.1367	9.16333	108.333	86.25	137	130.667
1110049F12Rik	15.2733	14.915	12.3333	10.24	199.667	180.5	234	205.333
1110051M20Rik	5.85	6.245	5.11333	4.29333	98.6667	97.5	124.991	110.667
1110054M08Rik	14.6133	17.55	10.01	13.2767	87.6667	97	87.3333	122.333
1110054O05Rik	3.37667	3.3525	2.30667	2.48	92.6667	85.5	91.6667	104
1110057K04Rik	12.0933	11.4675	7.46667	6.63667	279.333	244.993	250.333	234.667
1110058L19Rik	41.3033	42.245	19.6267	13.6333	231.972	219.486	160.296	117.324
1110059E24Rik	5.54333	5.02	4.08333	5.01667	67.3333	56.5	72	93.3241
1110059G10Rik	2.00667	1.6975	1.26333	1.03333	57	44.5	52	44.9907
1110067D22Rik	10.2933	8.88	7.17667	7.57667	296.667	237.25	299.667	334.333
1190002H23Rik	72.6867	40.25	18.47	15.0967	565.991	291	209.333	179.667
1190002N15Rik	9.82333	9.5825	8.44667	8.44333	329.991	298.25	411.324	435
1190005F20Rik	11.6133	11.79	9.06333	8.56333	261	244.736	295.991	294.991
1190007F08Rik	2.83	2.91	3.7	5.39667	17	16.25	32.3333	50
1190007I07Rik	11.1133	9.5375	6.06	4.09333	52	41.25	41.3241	29.3241
1200009I06Rik	2.18	2.315	1.77667	2.07333	51.3241	50.25	60.6667	74.6574
1200009O22Rik	2.56	2.52	3.5	7.08667	114	103.75	225.333	483.667
1200011I18Rik	4.66333	4.8625	3.71333	4.11667	216.324	209	249.667	292.667
1200011M11Rik	3.90333	3.5225	3.71	3.66333	107	90	147.667	154
1200014J11Rik	5.93333	6.9	7.61667	7.80667	147	158.743	273.333	296
1200016B10Rik	2.11333	1.97	1.24667	1.27667	65	56.2361	55.6667	60
1300001I01Rik	90.47	97.075	124.79	86.0833	4641.93	4619.17	9280.53	6765.5
1300010F03Rik	56.7433	46.1275	72.0633	40.7733	3344.2	2517.33	6154.94	3675.52
1300014I06Rik	9.23	8.4525	6.33333	7.95333	147	124.25	146.667	194
1300018I17Rik	10.49	12.22	12.9933	14.16	277.657	299	498.648	574.306
1300018J18Rik	11.09	12.1375	8.05	6.39667	222.981	225.993	234.667	196.667
1500001M20Rik	6.18333	5.9475	6.43333	4.73	61.3333	54.7431	92.6667	72
1500002O20Rik	4.48667	6.0325	5.38	6.86667	85.3241	106.493	148.333	199.991
1500003O03Rik	20.0633	20.4525	21.2467	21.8733	418.648	395.708	642.954	699.63
1500009L16Rik	1.82333	2.0775	2.00333	4.33	14.6667	15.5	23.3333	53.3241
1500010J02Rik	5.20667	5.8475	6.85667	7.79333	175.667	183	335.333	402.315
1500011H22Rik	5.87333	5.9025	4.44	5.64	68.6667	63.75	75.3333	101
1500011K16Rik	87.0033	85.485	169.677	145.293	126.667	115	358.667	324
1500012F01Rik	12.2333	19.8725	6.12	8.35	68.3333	102.25	49.6667	71.3333
1500015O10Rik	5.19	4.0875	3.48667	7.32333	34.3333	25	33.6667	74.6481
1500031L02Rik	6.10333	5.345	3.97667	3.99667	88.3333	71.5	83.6667	88.6667
1500032L24Rik	186.23	193.945	221.693	221.97	927.315	893.465	1604.62	1693.31
1600012F09Rik	4.8	4.13	3.68	3.20333	76	60.5	84.6667	77.6667
1600012H06Rik	5.88667	5.2275	4.10333	5.24	129.333	106.25	130.667	176.333
1600014C10Rik	16.2533	18.12	16.7267	15.31	430.667	444	643.333	621.333
1600021P15Rik	4.83	5.99	5.92667	4.43667	126.667	145.75	225.333	178
1600027N09Rik	6.67	7.5525	6.3	5.10333	67.6667	70.7431	93	79.3333
1700017B05Rik	2.88	2.485	4.78333	6.69667	117.667	93.75	282.667	418
1700019E19Rik	22.22	21.705	20.3633	18.97	146.324	132.236	194.657	191.324
1700020C11Rik	89.8367	90.15	119.523	72.7933	1067.67	993.5	2061	1323.33
1700020O03Rik	5.89667	5.605	6.47	7.20667	196.667	172.743	312.667	367.991
1700021F05Rik	50.72	51.2925	47.85	33.2433	387.648	363.736	530.954	389.287
1700021K19Rik	13.2933	15.555	12.8667	15.0367	592.667	644.229	832.611	1027.61
1700025G04Rik	18.0167	14.77	20.1033	32.2233	225.667	171.75	364.648	619.324
1700030K09Rik	2.96667	3.04	2.54667	2.28667	58.6667	55.5	72.9907	69.3333
1700034H14Rik	18.11	14.12	10.54	6.09667	202.657	146.743	171.333	104.333
1700037H04Rik	8.87	8.2175	10.5233	12.8033	93.6667	80.2431	161.333	207.667
1700040I03Rik	5.72	7.1325	5.79667	6.87	29.6667	34.5	43.6574	54.6574
1700040L02Rik	13.51	12.09	10.59	3.99667	142.306	118.5	161.991	64.3333
1700052N19Rik	3.66	4.36	3.23	2.96333	71.3333	78.25	91.3333	88.3333
1700066J24Rik	7.14667	8.16	9.87667	9.49333	43	45.5	86.3333	87.6667
1700081L11Rik	8.37	8.5675	8.61667	7.98	392.324	372.236	585.611	573.639
1700088E04Rik	20.8833	19.1175	21.9167	21.9533	222.667	188.75	339.667	359
1700113I22Rik	22.68	21.22	19.38	20.6	233.981	202.75	290.324	325.657
1700123O20Rik	6.19333	6.1475	5.45333	5.89667	72.6667	67	92.6667	106
1810006K21Rik	75.8433	58.87	54.4333	53.3667	391.231	281.194	408.287	421.963
1810008A18Rik	7.08333	7.8575	7.88667	8.58667	144.324	148.243	233.315	268.259
1810009A15Rik	15.53	15.2125	19.4767	21.39	81.3333	73.75	148	171.667
1810011O10Rik	59.1033	41.0475	18.8267	17.5567	669.333	429.75	310.667	304
1810012P15Rik	5.71667	5.6975	4.47	2.71667	390.333	359.993	443	284
1810013D10Rik	58.9733	65.5325	32.7833	16.5933	517.944	533.986	417.944	223.324
1810013L24Rik	17.7067	17.27	16.28	15.4033	593.324	536.5	790.991	791.981
1810014F10Rik	37.7667	35.34	29.6333	22.48	208.963	181.229	237.981	190.657
1810020D17Rik	45.2233	46.2275	39.5433	35.8967	308.648	291.486	392.315	375.296
1810026J23Rik	21.94	25.3525	24.8733	21.4133	583	623.75	959.324	870.991
1810027O10Rik	96.6067	86.75	48.14	48.1433	354.296	294.75	256.722	270.583
1810030N24Rik	25.93	24.94	10.54	7.97667	204.667	181.75	121	96.3333
1810030O07Rik	7.76333	7.5425	6.25667	5.60333	170	152.243	198.667	188
1810031K17Rik	11.21	11.4425	12.0633	14.6467	261.315	247.236	407.972	522.657
1810035L17Rik	60.95	67.07	61.74	57.75	150.824	153.028	221.926	219.037
1810037I17Rik	15.0067	14.9825	14.9333	16.4667	124.667	115	180.333	209.333
1810043G02Rik	7.53667	8.415	6.24667	6.17333	108.611	112.611	130.917	136.657
1810043H04Rik	39.4433	39.0175	28.6167	20.5567	260	238	273.667	207
1810046J19Rik	36.2933	34.25	25.8133	26.3733	227	198.25	234.667	252.667
1810049H13Rik	26.1667	30.6525	16.59	8.34333	180.333	195.75	166.333	88
1810055G02Rik	4.03667	3.64	5.18333	11.2467	64.6574	53.75	120.333	276.333
1810058I24Rik	36.6167	39.45	22.66	25.93	785.63	784.479	706.315	852.639
1810063B05Rik	17.8033	16.9225	12.3033	9.22	111.333	97.75	111.667	88.3333
1810063B07Rik	2.2	2.6125	1.84333	2.02667	43.3333	47.5	52.6667	61
1810074P20Rik	10.8267	10.735	8.34667	6.72333	250.333	229.715	279.963	237.981
2010002N04Rik	4.49333	4.99	5.23333	4.64	76	77.9931	128.657	120.667
2010007H12Rik	7.14333	7.1	6.87667	6.31667	57	52.5	79.6667	77.3333
2010011I20Rik	3.27667	3.6775	3.47333	3.75333	99.6667	104	153.333	175
2010012O05Rik	5.83	5.5575	4.27333	2.83333	107.944	95.7083	114.917	80.3333
2010106G01Rik	19.0733	17.26	15.0167	16.68	304.324	253.729	347.324	407.306
2010107E04Rik	689.443	681.922	368.057	277.78	2141.69	1964.03	1661.54	1321.72
2010109K11Rik	5.67	4.6875	3.89	3.27	200.667	154.25	199.667	177.333
2010111I01Rik	6.09333	5.575	5.25667	8.17667	181.657	153.993	228	374
2010305A19Rik	6.76333	6.5925	7.53	5.93667	165.667	149.75	267.333	222.667
2010321M09Rik	4.79	4.88	5.17667	5.65	130.667	123.25	205	235.991
2210010C17Rik	2.29	2.05	2.33667	2.81	37	30.5	54.6667	69.3333
2210012G02Rik	2.47	2.625	2.37333	2.88667	131.333	129.25	183	235
2210013O21Rik	9.94	9.0875	6.72667	6.91667	98.3333	83	96.6667	105
2210016L21Rik	13.0867	15.7625	13.76	13.99	126.991	141.5	193.667	207.667
2210018M11Rik	7.05	6.2975	6.46	7.23333	241.333	199.5	320.991	380
2210020M01Rik	20.0233	15.8775	12.7467	10.3733	152.333	111.25	140.667	121
2210021J22Rik	14.4767	17.9325	11.7533	7.13333	118.333	135.993	139.611	89.3241
2210411K11Rik	3.12667	3.525	3.93333	4.08333	27.963	29	51	56
2300009A05Rik	5.01	4.82	2.97	2.76333	95.3333	85	82	80.3333
2310001A20Rik	18.5633	15.435	16.7	15.25	345.972	265.979	451.639	434.657
2310002L09Rik	31.6433	30.015	17.6	10.0233	258	227.25	208	125
2310003C23Rik	18.8	17.0375	15.8733	14.8133	296	248.5	362.333	357.324
2310003F16Rik	111.67	109.647	164.39	170.073	560.639	509.472	1197.63	1307.97
2310003H01Rik	8.20667	8.8325	9.73667	8.31333	212.667	211.743	365.333	330
2310003L22Rik	13.3367	12.2625	9.98	7.70667	133.667	113.993	145.333	118.324
2310004I24Rik	4.50333	4.1025	3.09667	2.60667	58.6574	49.4653	58.6574	51.963
2310004N24Rik	7.94667	8.4125	7.30333	7.71	52.4259	51.5069	70.0278	78.0185
2310008H09Rik	4.23667	4.5025	3.83	5.75	65	64	85.3333	135
2310010M20Rik	13.6033	15.7075	7.89	3.03333	111.324	120.25	93.6667	38
2310011J03Rik	13.94	14.0025	12.7933	14.8933	196.667	182.75	261.981	321.991
2310014H01Rik	10.0233	7.2625	11.9833	24.7667	227.333	151.993	393.981	861.315
2310016M24Rik	153.16	154.678	127.537	102.23	875.667	819.5	1060.33	896
2310021P13Rik	15.6767	15.5325	21.9067	24.4033	810.315	742.486	1642.6	1933.97
2310022A10Rik	23.1633	24.3775	22.3633	24.1533	516.324	502.993	724.324	824.333
2310022B05Rik	29.8367	29.3275	45.4567	51.4933	840	763.243	1853.31	2221.63
2310028H24Rik	9.07667	9.6725	9.33667	13.4533	158.991	156.743	237.324	360.981
2310028O11Rik	68.1267	68.45	51.3233	41.0267	1471.29	1368.74	1610	1357
2310030N02Rik	13.83	15.92	12.0933	9.28667	124.324	132.5	157.991	127.667
2310033P09Rik	7.27333	8.015	8.81333	9.64	76.9907	78.25	135.324	156.324
2310035C23Rik	4.26333	4.5625	3.62667	3.62	155.991	154.736	193	202.991
2310035K24Rik	18.3667	18.6875	19.5233	16.27	224	211	345.667	304
2310036O22Rik	44.2167	41.5325	48.04	48.0767	335.667	291.25	530	559.333
2310037I24Rik	2.39	2.3675	2.54667	2.83667	44.3241	40.5	68.6667	80.6667
2310039H08Rik	11.2567	14.2225	10.9033	11.89	74	86.75	104.333	120
2310040G24Rik	13.34	17.08	10.3233	5.29333	88	104.25	99	53.3333
2310042D19Rik	115.09	137.438	126.623	83.8567	3762.67	4161.5	6004.3	4197
2310044G17Rik	17.0733	16.8675	11.0667	10.9033	359.333	328.75	337.991	351
2310044H10Rik	59.6	61.415	82.2667	96.71	791.981	752.986	1586.63	1968.61
2310045N01Rik	16.4333	18.1575	19.4367	23.2033	95	97	163.333	205.667
2310046A06Rik	32.33	33.4825	21.9167	20.39	829.306	795.188	816.648	800.907
2310046O06Rik	6.62333	7.515	6.08333	5.61	169.333	177.75	225.667	219.324
2310047B19Rik	2.61333	2.925	1.89667	1.85667	48.3333	50	50.6667	52.6667
2310047M10Rik	11.3833	12.065	13.3067	11.6467	174.667	171.75	296	273.667
2310057M21Rik	4.05333	3.9925	3.41667	4.46333	76.3333	70	93.3333	128.667
2310061C15Rik	23.4733	25.4275	21.1133	17.56	287.667	288.5	375.667	329.667
2310061I04Rik	67.5	77.3075	82.44	62.9133	719.639	764.944	1277.94	1027.31
2310067B10Rik	39.8867	39.23	57.2567	34.9933	1696.31	1547.45	3530.88	2276.87
2310079N02Rik	11.39	12.7375	9.74333	11.1167	107	111	132.657	160.333
2400001E08Rik	39.21	38.4075	53.5467	55.7	358.667	323.743	711.333	781.333
2400003C14Rik	20.73	19.4575	18.9033	21.2467	384	333.993	508	603.333
2410001C21Rik	16.16	17.335	20.55	21.7467	294.324	292.236	543.63	607.306
2410002I01Rik	4.03333	4.5375	3.94667	3.66	95.3333	99.25	135.648	132.667
2410002O22Rik	10.6833	9.4225	9.04	8.18667	212.972	173.986	261.278	250.333
2410004B18Rik	13.7433	12.0525	13.98	12.7033	114	92.7431	168.657	161.333
2410006H16Rik	10.7567	14.5275	5.82333	8.96667	60.6667	75.75	47.6667	77.6667
2410015M20Rik	160.89	165.085	173.503	160.077	1033.96	980.493	1620.3	1574.31
2410016O06Rik	2.35667	2.6925	3.19333	3.59333	45.6667	48.25	89.6667	106.667
2410022L05Rik	13.36	12.575	13.76	9.82	90.3241	78.9931	135.333	101.333
2410066E13Rik	5.75667	5.155	4.35333	2.56333	83.6574	69.5	91.6667	57.3333
2410091C18Rik	17.5067	17.84	12.7467	11.4867	227.333	214.5	240.315	228.315
2410131K14Rik	6.58	7.86	6.27667	5.91	149.667	165.5	206.667	205.667
2500003M10Rik	17.3733	16.93	17.37	16.0667	479.954	432.743	695.991	680.333
2510002D24Rik	15.6033	15.7925	8.92333	6.69333	163.667	153.75	136	107.667
2510003E04Rik	20.6167	20.2375	19.8033	16.7267	433.963	394.215	604.315	539.296
2510006D16Rik	27.53	29.2325	31.83	41.16	180.972	177.75	303.667	414.333
2510009E07Rik	6.21667	6.7475	6.62333	8.39	270.667	271	418	559.333
2510012J08Rik	9.12667	10.51	11.37	13.21	203.667	217.25	367.667	451.667
2510039O18Rik	22.3367	21.805	31.1667	34.5933	519	468.75	1051.33	1230.67
2610001J05Rik	7.29	7.0225	5.40667	5.34	224	199.25	241	251.333
2610002I17Rik	2.22333	2.3325	2.36333	2.35	42.6389	41.4792	65.5926	68.9815
2610002J02Rik	5.21667	6.63	6.68	8.77667	66	77	122.667	169.667
2610008E11Rik	4.25667	4.6575	2.55667	2.15333	151.667	153.75	132	117.667
2610024G14Rik	8.73	10.3725	8.15667	6.26667	163	179.75	221.333	179.333
2610027L16Rik	7.49667	8.885	8.52333	8.96333	141.667	155.236	233.667	259.324
2610029G23Rik	1.87	1.6925	1.91667	3.00333	41.6667	34.9861	61.9907	102.667
2610029I01Rik	6.56333	7.225	6.89667	7.83333	130.333	132.993	198.667	238
2610034B18Rik	5.95333	6.535	9.08667	11.0333	110.667	112.5	245	314
2610035D17Rik	5.21	4.9525	6.49333	2.99333	67.6667	59.75	122.667	59.3333
2610101N10Rik	9.58667	9.0875	6.70333	6.02667	287.296	252.215	291.63	276.657
2610110G12Rik	4.04	4.315	4.30333	4.32333	66.3333	65.4861	102.657	109
2610301B20Rik	3.7	3.5625	1.95333	2.23333	63.3333	56.5	48.6667	58.6667
2610301G19Rik	10.16	10.885	11.8467	11.41	318.972	316.965	539.315	547.639
2610306M01Rik	5.55333	4.8925	4.86667	4.71667	59.6667	48.75	76	77.6667
2610507B11Rik	74.8067	79.7325	82.7333	91.3133	4735.59	4676.43	7588.27	8855.94
2610528E23Rik	30.8033	31.9925	29.8733	13.55	300.639	290.479	423.315	202.315
2700007P21Rik	3.01333	2.79	2.21667	2.36	87	74.5	93	104.333
2700029M09Rik	11.7533	11.8825	7.18667	5.06333	125.333	117.736	111	82.6574
2700050L05Rik	3.74333	4.2425	2.83667	2.54	142.324	149.736	156.667	148
2700060E02Rik	28.21	26.6625	15.73	16.78	269.981	235.743	218.324	245.657
2700078E11Rik	6.30667	6.4625	7.95	9.71	138.333	131	252.639	326.639
2700078K21Rik	24.97	23.135	25.95	22.2133	309.324	265.486	466.972	421.315
2700081O15Rik	9.08667	9.2325	10.1967	9.11333	325.333	306.25	530.333	500.667
2700089E24Rik	38.5433	42.08	31.17	30.8267	157.333	159	184.667	193
2700094K13Rik	22.3167	22.785	17.6833	24.8333	129	122	148.657	219.667
2700097O09Rik	5.49333	3.9	2.44	1.11	51.6667	33.9931	33.3333	15.9907
2810002N01Rik	22.32	23.6325	19.1567	16.69	194.981	190.986	242.991	223.324
2810004N23Rik	32.5733	34.4975	38.9067	35.7133	372	364.5	644.991	624.333
2810008M24Rik	7.99333	7.5575	6.16333	6.56333	126	110.368	140.667	158.87
2810025M15Rik	19.4367	18.4575	15.22	22.2233	197.333	173.75	224.324	345.991
2810046L04Rik	4.53667	4.6475	5.82333	4.98667	167	158.75	310.972	281
2810055F11Rik	4.32667	4.58	3.57	3.09333	62.6574	61.5	75.3333	69
2810403A07Rik	13.93	13.745	7.74	6.44333	350.972	321.222	284.324	248.944
2810405K02Rik	108.877	101.482	116.813	152.667	727.324	627.5	1133.66	1562.65
2810407C02Rik	28.0067	24.27	21.1	19.34	845.287	678.215	923.583	893.972
2810408M09Rik	4.13333	3.7925	3.50667	3.33667	65.6667	56	81	81.3333
2810408P10Rik	2.23667	2.125	1.6	1.47667	76	66.75	79	76.6667
2810417H13Rik	0.1	0.0925	0.27	2.61667	2	1.75	7.99074	81.3148
2810428I15Rik	72.5167	73.0425	80.0533	73.9667	405.639	378.215	649.62	633.602
2810432D09Rik	17.97	19.5575	18.3767	16.0233	126.657	127.25	187.667	173
2810432L12Rik	21.0933	19.295	23.3767	15.5567	484.528	410.465	777.907	546.759
2810453I06Rik	16.9633	15.9075	14.7933	13.3567	308	267.75	390	371.333
2810474O19Rik	7.05333	4.91	2.27667	3.51667	363.333	234.743	171	277
2900008C10Rik	4.11333	3.9825	3.74333	1.73333	41.3333	37.25	54.6667	26.6667
2900010J23Rik	146.737	128.018	103.747	90.37	889.25	718.215	912.639	838.63
2900010M23Rik	181.873	178.202	196.343	181.76	732.278	663.75	1148.28	1120.64
2900026A02Rik	11.5333	9.9275	17.21	21.1967	312.991	249.5	676.963	881.296
2900064A13Rik	32.5133	32.1725	34.7733	34.4167	296.667	271.736	460.648	480.981
2900073G15Rik	160.147	144.35	120.72	155.847	2423.99	2023.99	2654.67	3615
2900092E17Rik	18.9267	21.285	20.0067	21.8667	227.324	236.75	349.324	402.333
2900097C17Rik	7.38333	6.5475	5.58	3.98667	318.333	261.75	348.667	263.333
3010026O09Rik	2.87	2.6175	3.48	4.34667	27.6667	23.25	48.6667	64.3333
3110001D03Rik	35.97	38.33	37.4933	37.68	221	217.5	335	354.657
3110002H16Rik	17.4633	14.8025	10.2267	7.22	291.833	229.965	248.231	184.722
3110003A17Rik	11.94	9.955	11.0067	11.75	84.3333	64.75	112.657	127.324
3110040N11Rik	9.18	8.64	6.34667	7.26667	80.3333	70	80.6574	97.3333
3110043O21Rik	7.97667	8.36	6.87	5.97	217.324	211.25	271.333	248.991
3110056O03Rik	8.27	8.99	9.85	11.1	201.963	202.75	348.991	415.324
3110057O12Rik	11.5367	11.4275	6.21667	3.42333	406.324	372.736	318.657	184.657
3110062M04Rik	5.79333	7.265	3.69	4.13667	153	175	141.333	166.333
3110082I17Rik	3.45333	2.75	3.56333	5.37	42.3333	31	63.3333	100.667
3200002M19Rik	3.82667	4.3	4.94667	8.13667	26	27.25	49	84.6667
3425401B19Rik	51.1133	53.03	57.4133	54.5533	2412.62	2322.22	3928.28	3944.92
3632451O06Rik	5.25	3.8725	4.64	3.52	141.324	97	181.315	145.667
3830406C13Rik	4.71667	4.35	2.27333	2.12333	99.3333	84.5	69.6667	68.6667
40239	17.9467	18.3125	13.01	10.8	523.333	494	550.981	482.324
40240	1.36333	1.7825	3.54667	4.21	20.3333	24.75	77	96.3241
40242	23.5	25.22	18.6067	22.1367	303.333	299.75	348.333	437.333
40243	41.7133	40.8975	42.19	32.84	2213.9	2013.92	3243.81	2669.84
40244	11.6433	11.4875	8.45667	7.75333	254.731	232.701	268.102	259.593
40245	15.6233	14.3775	13.5	13.13	601.333	512.75	753.667	773.991
40246	3.78333	4.1425	4.29667	3.83667	64.3333	65.25	105.667	100
40422	2.12667	2.025	4.49667	8.48667	26.3333	22.9931	80.3241	160.324
40423	34.21	28.2425	26.5933	37.32	922.833	705.389	1039.76	1543.5
40425	19.7	19.015	25.96	28.4633	274.333	245.75	524.648	606.944
40426	3.77	2.8925	5.96333	13.4333	49.3241	34.9653	113.324	270.287
40427	2.41333	2.2325	3.14333	3.79333	48	41	90.3333	115.667
40428	42.1833	36.2725	29.7867	33.7433	860.861	685.833	881.889	1055.16
40429	17.29	15.1075	15.91	24.8133	671.333	542.25	896.667	1478.98
40430	15.4867	15.9725	22.71	38.4667	385.333	366.993	818.991	1466.31
40431	6.49667	6.085	5.05667	6.74	125	108.75	141.333	198.667
40432	6.28667	5.435	8.43667	20.27	268	214.25	521.315	1325.96
40436	47.4367	40.86	33.4533	51.62	609.333	485.75	624	1017
4430402I18Rik	6.78333	5.9375	5.08333	2.15333	110.667	89.7431	120.333	53.6667
4632411B12Rik	20.2833	25.0025	21.3633	19.5233	804.648	919.229	1229.95	1185.65
4632415K11Rik	6.56667	7.32	6.81333	6.15333	144	148.493	216.667	206.667
4632428N05Rik	7.43333	7.4125	11.3367	16.4767	303	279.167	669.565	1029.66
4732415M23Rik	11.1333	9.5175	12.3433	10.3733	49	39	78.9907	70
4732418C07Rik	11.5033	11.3875	8.25	8.73	421	385.236	437.972	489.324
4831426I19Rik	2.48667	2.79	3.71333	3.88667	117	121.75	253.324	280.333
4833420G17Rik	6.61333	5.8475	3.33333	3.11	128.333	104.882	93.9352	92.2315
4833439L19Rik	34.09	32.39	29.6267	26.98	742.639	652.979	935.954	899.62
4833442J19Rik	10.58	8.6025	4.03667	2.37333	133	100	74	45.6667
4921513D23Rik	9.21333	8.0175	6.62	5.42333	501.657	403.736	523.306	452.667
4921524J17Rik	6.37667	6.9975	4.32333	4.17	86	87.5	85	86.3333
4930402E16Rik	31.32	30.78	32.9967	25.51	773.963	705.729	1181.26	965.972
4930402H24Rik	13.3033	12.2275	12.0733	11.57	562.972	480.743	741.981	749.991
4930420K17Rik	8.40667	7.7175	5.38667	3.82333	57.6667	49	53.6667	40
4930422I07Rik	2.64	2.5875	2.72667	2.10667	67.6667	61.7361	101.324	82.6574
4930432O21Rik	4.17333	4.0075	1.91333	1.42667	90	80	59.6667	47
4930444A02Rik	3.20333	3.295	3.48	4.28667	98	93.5	154.667	201.333
4930453N24Rik	6.39	7.3325	4.83667	6.24667	72.3333	76.75	79.3333	108.324
4930455C21Rik	22.91	25.8	19.6133	16.41	298.648	311.729	371.315	327.991
4930455F23Rik	5.66667	5.465	5.27333	5.32333	91	81	122.667	130.667
4930471M23Rik	20.6133	23.715	22.6833	24.7	536.667	571.743	855.667	985.324
4930534B04Rik	2.33667	2.2225	1.93	1.87667	96.3148	83.7431	115.657	118.306
4930562F07Rik	6.27	4.4825	4.97333	6.64333	44.3333	29.25	51	71.6667
4930572J05Rik	13.2933	13.6375	14.3167	9.26667	168.333	160.5	263	179.333
4930578C19Rik	2.07	2.65	1.98333	2.16333	31.6667	37.5	44	50.6667
4931406C07Rik	3.55	3.69	2.34	3.33	77.3333	74.4931	73.9815	111.324
4931406P16Rik	14.4733	12.15	12.22	17.4567	715.333	556	876.324	1322.64
4931414P19Rik	1.97	2.7025	2.56333	2.31333	43.3333	55.25	81.9907	77.9907
4931428F04Rik	1.54	2.32	2.01333	2.51667	23.3333	32.5	44.3333	58.6667
4932422M17Rik	2.51667	2.6975	1.94667	1.24	68	67.5	76.6667	51.3333
4932438A13Rik	6.21333	5.6025	3.88	3.18333	837.917	701.465	759.324	658.954
4933403F05Rik	31.5033	29.43	20.25	13.27	817	708.743	760.981	526.657
4933403G14Rik	1.79333	2.32	1.87333	1.86	53.3333	64.25	80.6667	84.6667
4933407C03Rik	6.93333	6.6925	9.24333	16.53	262.667	233.979	508	961.991
4933411K20Rik	4.8	4.04	3.58	3.18333	184.667	143.75	200	188
4933421E11Rik	2.86	2.5675	1.43	1.23333	85.3333	71	62	56.3333
4933424B01Rik	6.04667	5.64	5.97	6.36667	157.333	136.5	225.324	254
4933426M11Rik	33.53	31.4275	27.7367	22.8633	1420.33	1232.97	1704.31	1482.67
4933428G20Rik	7.59	6.125	11.0567	17.0433	351.991	262.479	742.972	1213.57
4933433P14Rik	3.68	3.6225	3.70667	4.70667	87.3333	79.5	127.667	171.333
4933434E20Rik	17.5567	16.285	14.2967	11.6033	282.667	242.75	333.667	286
4933439F18Rik	18.35	19.29	14.6967	9.46333	662.333	644.743	769.991	523.333
4933440N22Rik	1.88	1.7425	2.19333	3.56333	42.3333	36.5	71.6667	123
5031439G07Rik	11.69	10.975	16.0633	20.66	500.657	434.486	996.667	1356.31
5033414D02Rik	16.2667	15.145	8.95	9.01	116.667	100	93.3241	99
5033425G24Rik	4.25	4.285	7.49333	7.85	75.3333	70.5	193.333	214
5133401N09Rik	8.51	10.075	8.03	7.48667	108.917	118.861	149.25	146.231
5430407P10Rik	1.98333	2.4125	1.71667	1.92333	73	82.25	91.6667	108
5430411K18Rik	2.75	2.95	2.39	2.3	226.333	225	285	290.324
5430416O09Rik	2.34667	1.625	1.62	1.06333	81.6667	52.5	82	56.3333
5430435G22Rik	2.12333	2.1525	2.7	4.80667	45.6667	42.25	84	158.333
5430437P03Rik	41.8333	43.5425	56.4833	59.14	481.287	462.889	943.407	1042.27
5730403B10Rik	25.2633	25.8875	26.3267	19.4733	752.667	715.25	1137.67	887.667
5730409E04Rik	9.74333	9.2825	6.94333	8.12333	161	141.5	166.333	206
5730419I09Rik	4.81667	5.85	3.98	4.32333	170.333	192	204.315	234.315
5730437N04Rik	69.7433	70.5625	70.8633	60.3167	562.648	527.25	829.954	745.315
5730455O13Rik	8.83333	8.7675	7.37333	6.05333	105.296	96.7361	127.667	110.324
5730455P16Rik	10.49	10.78	6.64667	5.15667	340	324.25	313.333	255.991
5730469M10Rik	13.7333	13.25	8.95	5.16	179.667	160.243	170	103.333
5730494M16Rik	5.85333	5.24	4.26	4.88	59.6574	49	63	76
5730494N06Rik	5.26	5.47	6.43667	5.47	71	68.25	126	112.991
5730528L13Rik	6.64667	7.415	8.66	8.91	90.3333	93.25	171	185.667
5730601F06Rik	4.76	4.34	2.54	2.56667	254	215.25	196.667	209.667
5830417I10Rik	2.52667	2.79	4.63	3.76	46.3241	47.4931	122.991	105.667
5930416I19Rik	4.80667	4.6875	4.22	5.36667	63	56.75	80.3333	107.667
5930434B04Rik	27.9633	29.0875	32.6433	23.78	583.917	561.354	987.602	760.898
6030419C18Rik	12.74	12.9825	16.0167	14.8767	232	218.75	422.667	414
6030429G01Rik	4.99333	5.9875	4.63667	2.93	93	103.25	125.667	83.6667
6030458C11Rik	5.46	5.96	4.35333	4.42667	172.667	174.75	200.333	214.667
6230427J02Rik	5.32667	6.405	8.04333	9.43	46.3333	51.5	101.667	126
6330406I15Rik	5.75	5.075	4.98	8.63333	140.667	114.25	176.667	324.667
6330408A02Rik	5.45	5.9225	6.76333	5.96667	154	155.5	277.333	258.667
6330409N04Rik	20.1833	16.9675	13.49	9.56333	290.324	226.75	281.648	210.667
6330416G13Rik	4.59333	4.93	4.35333	3.07333	142.333	142	195.667	145.667
6330577E15Rik	33.5433	34.1125	36.72	33.2967	452	424.993	717.657	687.333
6330578E17Rik	41.5167	42.2025	33.8067	32.9267	1345.33	1266.75	1589.66	1635.33
6430527G18Rik	13.5867	15.2475	20.28	21.7833	475	493	1028.67	1169
6430548M08Rik	5.33	4.99	6.43	8.89667	158	137	276.315	404.315
6430571L13Rik	1.86333	2.425	3.02333	3	40.6389	48.75	95.3333	99.6667
6430706D22Rik	9.91333	9.2675	6.13333	10.85	164.167	142.34	147.75	275.315
6530401N04Rik	2.62667	2.995	2.44	2.76	57.3333	60.5	77.3333	92.3333
6530418L21Rik	9.63	6.69	7.10333	5.38333	287	184.5	307	245.657
6720456B07Rik	53.6667	57.905	45.63	52.04	500.333	499.75	617.667	743.667
6720456H20Rik	3.19333	2.955	2.58667	2.98667	135	115.75	158.324	193.62
6720475J19Rik	5.48667	4.6475	4.64667	2.23333	67	52.75	82.3148	41.6481
6820408C15Rik	2.60667	2.335	2.45667	1.12333	37.3241	31	50.9907	24.6574
8030462N17Rik	8.16667	7.9575	7.04667	7	237.657	214.25	297.667	311.667
8430406I07Rik	6.2	7.0375	5.93333	3.45333	143	150	198.333	122
8430408G22Rik	60.5467	39.7475	37.2633	21.3833	643.333	397	578.333	348
8430410A17Rik	3.87333	3.9275	3.71333	4.29333	46.3333	43.5	64.6667	78.6667
8430410K20Rik	20.1	18.515	17.6033	16.3467	470.306	401.993	597	586.324
8430419L09Rik	3.09333	2.9325	3.52333	3.66333	77	67.25	127.324	139.657
9030418K01Rik	4.74333	4.105	4.42667	4.44333	92	74	124.333	132
9030425E11Rik	1.47	1.2825	3.05667	4.83667	36.6667	29.5	110.333	185.324
9030617O03Rik	24.2367	27.06	18.8267	8.29333	666	689.486	751.315	348.991
9030624J02Rik	11.1967	11.6275	13.51	15.1433	295.593	283.472	516.898	612.491
9030625A04Rik	1.62	1.8275	1.56	3.1	33.3333	34.25	46.6667	97.6667
9130011E15Rik	7.66	8.0625	8.59667	6.82667	187.352	181.681	304.972	255.583
9130011J15Rik	37.9467	33.2425	25.4667	22.8533	917.63	744.229	893.954	846.898
9130221H12Rik	6.47333	5.9275	6.82667	6.25333	44.6667	38	68.3333	66.3333
9130401M01Rik	3.18333	3.26	3.45667	4.15333	110.667	104.75	174.657	221.333
9130404D08Rik	15.8833	16.5575	13.5	13.14	393.574	379.66	485.435	497.954
9230105E10Rik	2.11667	4.325	1.21	2.42333	44.6667	81.5	37.3333	78
9330129D05Rik	24.0533	24.2125	13.0033	6.15333	486	453.25	382.667	190
9330158H04Rik	2.65	3.31	2.71333	2.56333	71.6667	82.75	106.333	106
9430016H08Rik	6.74667	6.7075	5.87333	5.21	200.324	184.75	253.315	236.657
9430020K01Rik	21.64	18.18	21.8233	30.1933	1220.55	950.931	1785.75	2609.04
9430023L20Rik	20.5733	20.22	18.6433	18.1967	215.667	195.75	283.667	292
9530068E07Rik	49.2133	46.09	45.0767	55.0267	1033.33	893.5	1373	1769.33
9530082P21Rik	1.99	2.23	1.63667	2.66333	38.6667	39.25	46.3333	79
9630025I21Rik	2.53333	1.8925	1.38	1.16	81.3333	56.5	64.3333	57
9630033F20Rik	18.2633	22.64	16.9567	14.52	564.324	650	760.296	687.648
9830001H06Rik	4.45667	3.535	6.37	9.28	502.333	369.5	1040.33	1604.98
9930021J03Rik	3.81	4.0525	2.43	2.09667	72	71	66.6667	60.6667
9930104L06Rik	3.24667	3.2325	2.03333	1.96	81.3333	75.25	73.9815	75.3333
A130010J15Rik	2.3	2.4125	2.45667	2.08667	38	37	59	53
A130022J15Rik	6.18333	5.22	4.36	5.00333	168.648	131.986	172.667	209.333
A230046K03Rik	3.96	4.16	2.80667	3.53333	197.333	191.743	203	270.287
A230050P20Rik	4.82667	5.435	3.88	4.97667	55.6667	57.5	65	87.6667
A230051G13Rik	9.6	7.02	8.58667	6.22	328.667	223	427	326
A430005L14Rik	8.21	6.6575	6.47	6.20333	76	57	87	87.6667
A430105I19Rik	12.14	12.74	13.6967	12.4967	460.333	447.736	753.667	725.667
A430107O13Rik	8.78667	8.0925	5.64333	5.41	366.333	313.493	341.333	345.991
A430110N23Rik	3.10667	3.4525	7.45333	27.63	112.667	115	392	1540.9
A4galt	4.15333	2.9375	3.16	4.05667	72.3333	47	79.6667	108.315
A530016L24Rik	23.5633	20.65	21.9333	5.17333	361.991	294.493	489.324	121.333
A630007B06Rik	8.28	6.7925	6.39667	5.31333	194	147.75	217.333	190.667
A730011L01Rik	2.03	2.215	2.49	2.51667	87.3333	88.5	155.333	166
A730069N07Rik	2.3	2.305	3.82667	3.41667	68.3333	63.75	164.667	155.667
A830007P12Rik	2.36333	2.5975	3.95	5.89333	65	66	157	248.333
A830073O21Rik	21.3867	23.2125	25.7433	16.7567	368.333	370.215	642.648	442.324
A930001N09Rik	6.00667	6.5375	5.64333	3.38333	189.667	191.75	258.333	163.667
A930004D18Rik	2.15333	2.39	2.44333	2.05667	59	60.75	97.3333	86.6667
A930038C07Rik	1.64	2.01	2.19667	1.42333	65.3333	74.25	126.667	87
AA408296	1.99333	1.8125	2.12	1.71	94	79	145.315	123.667
AA881470	3.87	4.155	3.99667	4.54	127	126.493	190.333	228.667
AA960436	8.27333	8.39	10.2667	10.33	120	112.25	215.991	229.667
Aaas	6.63333	5.485	4.67333	6.97333	98.6574	75.4792	100.657	158.991
Aacs	1.74	1.825	2.61667	4.32333	46.9815	45.5	102.333	179.333
Aagab	10.6233	10.2025	7.82333	8.66333	234.991	209.25	251.648	293.306
Aak1	5.60667	5.365	4.63	4.44333	861.991	764.743	1033.33	1047.66
Aamp	68.7133	71.2325	82.9433	75.6333	1016.61	975.924	1780.91	1714.22
Aars	16.9267	19.6275	27.3667	37.6367	628.269	674.486	1471.59	2137.87
Aars2	11.2933	12.8075	13.2833	10.3733	321.963	338.222	549.639	452.963
Aarsd1	28.9	31.3875	31.9333	22.9733	328	330.5	525.991	399.333
Aasdh	4.78333	4.5525	2.16	1.53667	149.667	131.75	98.3333	73.6667
Aasdhppt	8.35667	8.385	5.50333	4.28333	180	167.5	172	141.333
Aatf	6.85	7.4275	7.42	7.43667	104.981	105.729	164.981	174.333
Aatk	2.14	1.7175	2.28333	1.72333	96	71.25	148.657	118.333
AB112350	1.8	1.8525	1.78333	3.02	56.3333	53.75	81	145
Abat	10.33	11.465	5.24667	4.12333	402.333	413.743	297.306	246.667
Abca1	4.93667	4.9525	5.98333	7.39	430.972	400.479	757.63	992.306
Abca2	14.1167	17.3875	17.96	18.38	968.602	1104.44	1786.24	1931.88
Abca3	6.81333	6.5075	7.16333	8.36333	374.324	330.75	570.315	703.639
Abca6	4.11667	4.6975	2.91667	2.35	181.62	192.743	187	158.991
Abca7	4.46	5.2225	6.07667	6.32333	250.324	271.229	494.63	544.667
Abca8a	18.8567	22.0425	14.94	15.9133	889.324	961.958	1022.31	1150.96
Abca8b	4.27667	4.7775	3.14667	3.39667	193.324	200.493	206.333	235.324
Abca9	5.32333	5.16	4.87333	7.16	284	255.243	377.315	586.62
Abcb10	15.72	16.6025	13.8467	9.98	576.333	563.743	736	559.667
Abcb1a	5.1	5.7425	4.22	3.36	213.639	222.993	256.667	215.657
Abcb4	10.4267	13.51	8.64	9.84	361.991	435.688	434.648	522.667
Abcb6	10.8367	11.945	13.8567	14.8267	270.657	275.993	501.981	566.639
Abcb8	39.1533	45.76	35.8867	24.6233	982.324	1065.24	1306.88	945.241
Abcb9	4.91	6.3625	7.81	6.51333	139.324	167.736	321.315	283
Abcc1	10.0133	10.39	12.31	17.2567	505.296	485.743	900.981	1334.61
Abcc3	0.433333	0.5275	0.85	2.41333	18.3333	21	52.3333	158
Abcc4	3.52	3.44	3.53333	4.65667	171.324	154.993	248.667	346.667
Abcc5	9.09333	7.9	5.85	4.54667	479.648	385.236	448.657	366.991
Abcc8	18.0133	18.755	20.9033	17.2467	759.269	730.215	1278.25	1113.54
Abcc9	73.1867	73.12	72.0267	46.7633	4595.37	4253.22	6555.55	4494.15
Abcd1	15.0833	16.4575	20.2133	20.9	436.667	440.25	847.333	927
Abcd3	41.7267	34.39	31.82	20.57	1206.85	923.389	1336.19	910.565
Abcd4	3.9	4.76	4.25333	5.04667	76.6667	86.4931	121.306	151.981
Abce1	14.9867	14.095	12.3633	14.1	486.315	423.25	581.991	701.315
Abcf1	41.1	43.7275	49.9767	50.5567	1102.25	1084.94	1943.51	2075.84
Abcf2	25.4233	25.83	23.2767	22.2867	532.639	500.486	707.62	714.222
Abcf3	20.0367	19.8825	23.95	22.72	560.907	515.438	972.593	973.565
Abcg1	2.00667	2.725	2.40667	6.87667	61	76.25	106.324	320.991
Abcg2	9.84	10.33	5.86333	7.04333	208.657	202.486	180.648	228.315
Abhd1	6.51	3.4125	6.43333	3.95333	72.3333	34.75	103.324	67
Abhd10	6.02667	5.405	3.78	3.07333	109	90.5	99.3333	85.3333
Abhd11	27.5367	28.7525	21.2833	17.41	348.648	337.993	391.63	337.324
Abhd12	28.37	26.4325	21.1767	23.8033	312	268.736	338	400.972
Abhd13	5.46667	3.8975	3.86667	4.09333	236	155.5	242	270.667
Abhd14a	11.7667	10.9575	8.77667	9.26667	121	104	130.667	145.333
Abhd14b	10.2667	9.5325	4.89667	3.81667	127	109	88	72.3333
Abhd2	6.08667	4.9775	9.42	14.0667	150.333	114	336.667	532.639
Abhd4	24.6633	26.9275	21.69	22.5	490.657	496	625.991	685.306
Abhd5	15.8	16.6475	15.7167	13.7033	422.991	412.986	610.667	562.667
Abhd6	3.02333	4.4725	3.34333	2.99333	52	71	83.3333	78.6667
Abhd8	17.7067	19.675	15.7933	15.0267	296.667	304.743	383.667	385.333
Abi1	8.9	7.6275	8.21333	11.74	244.667	193.493	327.259	494.991
Abi2	3.49	3.3175	2.45	3.30333	166	146.5	168.991	241.333
Abi3	8.00667	7.405	9.79	15.08	98	83.5	174	283
Abi3bp	4.95	3.8025	3.74	7.82333	162.963	115.743	178.667	396.657
Abl1	16.6767	16.29	19.68	21.6967	816.667	738.75	1397.65	1628.63
Abl2	4.28667	4.245	4.06333	4.38667	381.333	350.243	524	597.333
Ablim1	72.6	64.1575	97.81	91.32	1696.1	1389.57	3313.29	3264.45
Ablim2	9.61	9.355	10.3733	7.61	286.981	259.243	449.861	347.62
Ablim3	23.5333	19.73	20.23	16.69	902.88	702.91	1126.11	980.37
Abr	10.3833	9.0975	10.3433	9.65	481.991	391.743	694.991	686.306
Abra	18.1567	18.1	22.1567	29.39	272	251.25	483	674
Abt1	2.92	3.11	3.08333	2.57333	110.667	108.75	169.667	149.667
Abtb1	17.3533	18.9775	19.68	16.0633	268.954	272	442.639	381.324
Abtb2	11.47	13.8575	14.3933	13.1767	444.667	497.743	809.981	783.63
Acaa1a	31.0833	33.18	26.25	21.8233	465.315	458.972	570.324	500.296
Acaa2	688.293	603.93	633.747	280.967	8790.18	7139.84	11751.8	5480.93
Acacb	81.97	89.06	141.593	95.1333	5204.57	5244.12	13029.3	9240.8
Acad11	55.5567	59.0525	51.36	35.27	1416.49	1395.03	1900.26	1376.25
Acad8	19.43	21.305	13.7	9.89	473.657	480.75	485.333	369.315
Acad9	13.7233	15.0775	10.4933	9.22	456.88	465.458	507.898	470.259
Acadl	577.017	553.938	419.56	265.17	9293.21	8268.83	9811.42	6532.55
Acadm	529.997	518.232	387.187	177.7	8324.3	7545.84	8833.7	4269.17
Acads	147.637	155.813	105.143	65.2633	2308.88	2257.36	2389.85	1561.15
Acadsb	52.9967	49.305	33.0233	22.1	1462.64	1259.47	1323.31	934
Acadvl	568.633	546.097	498.9	247.547	10446.1	9304.93	13301.6	6955.81
Acap2	6.11333	5.5225	4.08667	5.29333	337.667	282.243	327.315	448.324
Acap3	5.53	5.81	6.65333	7.89	202.963	197.479	354.593	443.926
Acat1	182.497	171.833	121.397	65.2933	5238.98	4574.73	5067.65	2866
Acbd3	10.8267	10.4	10.8567	12.4333	316.315	281.75	459.667	556.981
Acbd4	8.67667	8.14	6.93333	6.48667	153.324	133.979	177.991	175.657
Acbd5	5.32667	5.0325	4.84333	5.19	159	139.25	210	237.667
Acbd6	21.83	23.8375	26.37	25.4033	277.62	280.479	486.259	494.954
Accs	2.96333	2.8075	2.33667	2.54667	50.3333	44.25	57.6667	66.3333
Acd	7.67333	8.435	9.16333	11.16	92.6574	94.5	160.667	206.667
Ace	24.8033	23.805	27.3433	58.59	923.62	818.417	1474.9	3346.69
Acer2	12.55	8.2775	5.04333	4.67333	442.991	269.25	258.991	251.981
Ache	2.59667	2.4375	1.99667	1.53667	48.3333	42	53.6667	43.6667
Acin1	22.5067	23.6825	30.6267	31.2367	844.898	822.056	1669.98	1797.46
Acly	14.23	13.77	15.1067	19.4667	519.639	465.465	800.287	1090.6
Acn9	8.92333	10.18	7.20667	7.10667	41.6667	44.25	49	51
Aco1	12.3733	13.465	16.8067	17.07	454.657	458.993	895.981	961.963
Aco2	879.61	1030.5	949.403	708.92	19916.3	21624	31201.7	24563.7
Acot1	6.82	2.2125	8.21333	2.47667	90.6667	27.25	158.333	50
Acot11	7.14333	7.685	6.65667	6.54667	262.991	261.993	355.315	368.991
Acot13	305.153	324.335	186.997	147.907	1781.33	1753.49	1588	1322
Acot2	25.6	15.3675	30.2567	14.8367	473.333	263	811.333	419
Acot7	56.97	60.78	67.22	51.0067	703.991	697.75	1206.29	965.611
Acot8	7.67667	8.8925	9.72667	9.85	74.3333	79.75	137	146.333
Acot9	8.56	7.565	5.25	6.77667	122.324	100	109	148.333
Acox1	120.513	112.982	100.597	74.04	3957.81	3435.06	4793.46	3723.13
Acox3	7.96667	9.725	7.85667	9.25667	268.333	303.25	383.991	477.667
Acp2	9.09667	9.48	10.2267	13.7867	195.333	187.736	318.333	453.972
Acp6	14.4733	15.8325	15.0267	9.65667	213.657	216.472	322.306	217.991
Acpl2	2.83333	3.16	2.94333	3.55667	75.3333	78	113.667	144.667
Acsl1	274.317	252.71	248.977	158.397	8910.27	7623.1	11734.8	7869.6
Acsl4	3.17333	2.7175	2.64	3.08333	142.657	112.979	171.667	212
Acsl5	6.73667	5.895	6.39333	11.24	180.667	145.486	248.648	461.315
Acsl6	5.95333	7.8025	5.07	4.45333	155.667	188.486	192.315	178.241
Acsm5	3.19	2.36	2.07333	0.546667	67.6667	46.2431	63.9907	17.6667
Acss1	167.313	147.523	149.75	81.3267	5102.52	4165.91	6629.21	3797.86
Acss2	16.99	18.7175	18.9733	19.6767	409.667	417.979	663.657	726.63
Acta1	227.193	63.69	227.5	3544.43	2770.19	715.194	4043.94	66325.9
Acta2	83.45	60.035	120.557	133.513	1264.27	844.708	2643.78	3097.68
Actb	167.077	139.898	251.75	462.38	2685.67	2073.99	5862.31	11404
Actc1	8061.84	6367.15	8906.7	10159.3	95389.8	69621.8	152801	184276
Actg2	5.41667	3.8625	14.9433	74.91	57.25	37.7361	229.537	1214.36
Actl6a	13.5233	13.0575	14.9067	14.97	204.648	183.201	327.324	346.63
Actn1	13.89	12.4775	16.4533	48.2467	434.972	361.708	746.639	2320.24
Actn2	902.93	1024.95	1223.53	1410.31	22944.6	24122.3	45049.6	54917
Actn4	49.75	42.5775	63.9933	109.22	1473.11	1166.33	2745.79	4955.06
Actr10	27.1967	24.0475	18.2467	17.9867	355.63	290.493	345.954	360.296
Actr1a	47.9033	49.4475	57.0367	60.2633	1117.89	1068.92	1929.59	2155.93
Actr1b	45.4233	46.59	41.9233	57.3933	802.935	762.41	1075.56	1555.54
Actr2	17.8833	16.2675	17.1633	20.9233	552.315	465.493	768.287	991.306
Actr3	14.0433	12.1175	14.85	20.7267	299.667	238.743	458.991	677.667
Actr3b	34.7967	46.1975	24.98	13.65	507.296	624.479	528.63	304.981
Actr5	2.98333	3.2625	2.91	2.71	60.3333	61	85.3333	84
Actr6	3.97333	4.3575	2.17	1.74333	57.6667	58.5	45.6667	38.6667
Actr8	18.69	20.7225	17.5667	14.2167	328.333	337.472	447.648	381.972
Acvr1	6.9	6.8775	6.68333	9.06333	163	150	228.667	328.324
Acvr1b	8.7	9.2475	9.29333	8.12333	242.667	239.5	375.991	347
Acvr2a	3.71	4.2325	3.34	2.97667	143	151.229	186.648	176.333
Acvr2b	2.15	2.28	3.09667	2.18333	31.3333	30.75	65.3333	48.6667
Acvrl1	14.0767	12.04	15.4367	22.0067	434.333	342.75	690.324	1040.99
Acy1	9.02667	10.265	7.76	6.04333	109.991	115.993	137.324	112.667
Acy3	16.43	17.1475	16.0933	9.72667	210.333	203.5	299.648	190.667
Acyp1	9.79	10.28	6.30667	5.47333	53.3333	51.75	50	45.6667
Acyp2	73.9533	70.1725	56.6033	34.8233	422.519	371.562	469.583	304.481
Ada	0.72	0.3525	0.8	2.74	10	4.5	16	58.3333
Adal	3.77	3.1975	2.33	1.90333	74.3333	58.4931	66.6574	57.6667
Adam10	14.9	13.515	17.7933	25.73	314.315	264.486	544.963	832.602
Adam11	6.66	5.3275	6.99333	6.29333	182.981	134.5	279	263.991
Adam15	27.56	22.635	33.3267	63.57	700.981	530.736	1229.28	2478.81
Adam17	10.1667	9.1975	10.3033	14.59	372.991	311	547.935	820.62
Adam19	4.33667	5.3025	13.4367	19.27	235.333	267.993	1057.99	1606.98
Adam9	18.6833	17.7275	16.26	25.58	610.935	536.931	771.231	1285.46
Adamts1	16.7133	12.995	14.07	26.3833	692.657	500.243	848.333	1672.65
Adamts10	10.58	10.1825	7.83667	11.9267	335.991	298.993	362.657	580.991
Adamts12	0.4	0.2	0.863333	2.97333	16.3333	7.75	51	186.333
Adamts15	3.07333	2.2925	3.82	4.83667	155.333	107	279.333	374.333
Adamts2	7.70667	7.5375	16.6667	58.78	245.333	220.993	768.648	2875.58
Adamts4	0.116667	0.0625	0.57	3.43333	3.66667	1.75	25.6667	164.991
Adamts5	4.25667	3.5275	6.02	6.49	293.667	225.25	601.324	686.333
Adamts7	7.58	8.155	8.93667	6.66	345.333	342.986	590.315	464.315
Adamts8	0.926667	2.505	4.06	41.5933	28.6667	71.5	182	1982.32
Adamtsl2	5.71333	6.2775	8.37667	30.83	157.667	159.75	336.324	1304.99
Adamtsl3	1.71667	1.5575	1.34	2.23	113	95.2431	127.667	225.333
Adamtsl4	26.3267	28.6125	27.0833	24.1033	864.333	869.222	1290.95	1212.29
Adamtsl5	29.5967	31.8325	55.4633	70.4567	248.981	248.75	677.62	909.981
Adap1	2.03333	1.63	2.08	2.94333	37.3333	27.5	55.3241	82.6667
Adap2	9.82667	7.82	6.89	7.90667	133.657	98.4931	136	164.667
Adar	5.99333	10.6325	8.45333	16.99	189.519	301.333	387.731	818.324
Adarb1	6.8	6.71	6.01333	8.36333	385	352	494	726.991
Adat2	1.85	2.815	2.4	3.74	17.6574	25	33.3333	54.6667
Adc	0.753333	1.0025	1.09667	2.76	12.3333	15.25	26	69.3333
Adck1	14.9267	16.045	14.2533	10.67	290.657	289.736	402.333	318
Adck2	4.33667	3.745	4.13	4.47	130.667	104.5	180.667	206.333
Adck4	5.06	5.4825	5.53	8.11	94.3333	94.25	149.324	231.639
Adck5	4.01667	3.6425	3.82	3.56333	69.3241	58	95.6667	94
Adcy1	2.41667	2.3025	2.75	1.74333	252	221.75	415.667	278
Adcy3	1.93	1.5025	2.32667	4.59333	53.7685	38.6528	94	196.685
Adcy4	11.0133	9.8925	14.3433	15.7467	317.981	264.25	601.333	696.657
Adcy5	24.2333	24.9125	34.6967	28.58	1445.17	1378.59	2994.93	2614.47
Adcy6	73.0167	75.83	75.77	48.94	3749.82	3611.12	5651.64	3847.11
Adcy7	3.51667	3.5525	4.85	14.3	187.333	174.25	375	1169.29
Adcy9	9.11333	8.805	11.09	8.7	345.667	309.75	609	505.333
Adcyap1r1	1.98333	1.59	2.27667	5.10667	105.333	78	175.333	416.333
Add1	47.2033	46.4825	49.97	54.4467	1273.65	1161.98	1954.64	2251.63
Add3	16.9467	16.28	21.17	21.28	577.315	513.472	1044.29	1110.33
Adh1	24.0033	26.9125	8.53	8.51	272.648	280.986	140.981	147
Adh5	48.53	47.4775	47.14	41.7967	633.296	573.979	892.972	834.935
Adhfe1	31.26	26.2125	20.53	8.54667	825.991	642.5	788.333	345.324
Adi1	19.33	17.835	15.94	10.4467	275.657	235.486	329.667	227.991
Adipor1	113.233	110.802	109.2	110.893	1949.92	1768.69	2726.85	2928.52
Adipor2	33.3167	32.1275	26.5533	27.4167	1124.33	1002.99	1299.67	1415.65
Adk	91.1267	79.7325	47.5367	33.8467	1319.63	1069.96	998.639	750.278
Adm	8.34333	8.82	7.62333	7.57667	93.3333	91.25	124	129.333
Adnp	16.91	16.5225	14.6167	14.7	705.667	638.5	883.333	940.667
Adnp2	3.72667	3.82	3.44667	3.32333	186	177.25	249.667	254.333
Ado	7.56333	7.6125	6.6	6.92333	245.333	229	310.333	344.333
Adora1	5.51	4.25	4.57	4.21333	202.333	144	243.333	237
Adora2a	4.17	3.3225	6.38333	6.46333	90	66.25	199.667	213
Adpgk	4.78333	4.9175	2.80667	3.8	100.667	95.75	85.6667	122.657
Adprh	29.45	29.7975	35.53	39.6067	396.657	371.25	694.667	817.333
Adprhl1	355.847	343.733	452.533	514.057	4133.56	3693.19	7636.13	9134.31
Adprhl2	8.95667	9.9875	11.8167	12.34	104.333	107.5	200	220
Adra1a	9.62667	7.5825	9.61667	4.07667	338.667	247.75	491.333	219.333
Adra1b	17.15	14.205	29.13	16.8067	445	341.75	1094.67	667.667
Adra1d	2.13	2.9975	3.09667	2.96333	43.3333	56.75	91.6667	92.3333
Adrb1	9.57667	10.925	15.4567	11.04	114	121	267.333	202
Adrb2	1.94	1.4375	1.92667	2.41333	35.3333	24.25	51	67.3333
Adrbk1	27.5233	27.2325	30.9433	32.1067	745.333	681.722	1214.64	1331.98
Adrbk2	3.13	3.92	2.83333	3.54	201.667	233.236	264.648	348.657
Adrm1	6.79667	7.3275	7.65333	7.06	82.6667	82.5	135.333	131.667
Adsl	34.05	36.16	32.6867	27.0133	611.296	600.465	850.565	742.25
Adss	3.69333	3.4725	4.02333	6.50667	80.3333	70	127	216.667
Adssl1	84.88	103.063	93.4267	73.1967	1252.94	1409.18	2000.64	1657.94
Aebp1	9.05333	8.4675	12.99	45.0567	292.306	252.229	607.898	2237.32
Aebp2	7.92333	8.235	8.02667	8.26667	446.324	428.979	655.954	712.657
Aen	8.47333	8.96	9.39333	11.3067	186	181.5	299.657	380.333
Aes	675.24	693.875	853.87	783.283	7742.34	7364.65	14211.7	13768.3
AF251705	1.2	1.0125	0.97	4.92333	11.6667	9	13.6667	73.3333
Afap1	4.60667	3.9975	5.67667	6.28667	259.333	208.5	463.963	542.324
Afap1l1	44.7933	43.895	48.28	54.2767	1297.27	1176.96	2028.22	2405.56
Afap1l2	1.35667	1.0425	1.82667	2.63333	41.3333	29.25	80.3333	122.667
Aff1	13.74	13.4225	12.87	11.8833	993.981	900.472	1348.62	1315.98
Aff4	12.2033	10.395	9.54667	11.2533	1049.3	828.736	1189.31	1484.96
Afg3l1	21.1867	22.235	20.6767	19.8267	762.333	740	1079.33	1092.99
Afg3l2	57.88	65.7225	58.7633	52.4267	1505.99	1584.24	2219.94	2089.3
Afmid	5.14667	6.03	5.14667	4.16667	100.667	108.75	146	124.667
Aftph	7.41	7.0425	5.90667	5.52333	245.333	215.75	284	279.991
Aga	16.39	15.19	12.7933	11.87	176.63	151.688	200.333	195.981
Agap1	6.91	6.5175	9.47667	8.56333	563.324	492.986	1118.98	1069.6
Agap2	3.44667	2.935	2.59333	2.42333	165.315	130.729	180.333	177.991
Agap3	18.74	19.895	24.6867	24.8667	511.315	502.472	977.963	1040.94
Agbl5	2.81667	3.125	2.93	2.97667	77.3333	79.25	116.667	125.333
Agfg1	10.4767	10.4075	10.2333	13.8133	279.648	256.486	396.63	564.963
Agfg2	5.95	6.9575	5.04667	5.17667	157.667	171	193.657	210
Aggf1	12.5133	12.12	12.15	11.87	340.648	305.229	479.333	495.315
Agk	2.11	1.4325	1.85333	1.64	39.6667	25	50.6667	47.3333
Agl	37.3667	40.535	37.16	27.4233	3061.27	3080.97	4412.56	3441.23
Agpat1	37.4033	36.81	41.4367	41.6833	587.667	533.243	944.657	1004.65
Agpat2	35.0933	38.6975	28.8933	29.9733	249.981	254.986	298.657	326.667
Agpat3	59.78	50.21	74.6567	54.7133	1749.64	1361.97	3168.28	2453.65
Agpat4	2.60333	2.495	2.91667	6.24333	42.3333	37.5	68.6667	156
Agpat5	7.25	5.9525	5.86667	5.36667	236.324	179.743	277.333	268
Agpat6	18.9533	17.7325	24.46	24.91	618.991	537.25	1157.98	1247.32
Agpat9	8.02333	5.305	8.31333	5.98333	196.324	119.993	295.333	224.333
Agps	6.26	6.1625	4.77	5.57	300.657	274.743	332.648	410
Agrn	16.2133	19.71	14.21	28.1967	944.324	1045.74	1202.98	2508.89
Agt	2.38	4.3225	3.29333	4.04667	37.3333	62.25	74.6667	97
Agtpbp1	28.2933	23.205	27.5333	17.0967	1170.21	890.451	1651.94	1083.99
Agtr1a	21.5733	21.595	18.6633	13.5933	400.667	371.493	502	386.324
Agtrap	13.7133	15.8875	14.7367	19.08	470.333	503.243	732.667	1002.97
Agxt2l2	6.82333	6.4325	4.57333	4.75	90.8241	79.4722	88.3611	96.9259
Ahctf1	6.21	5.835	3.45	3.7	369.667	322.243	298	338
Ahcyl1	29.4033	28.415	26.6133	25.3	963.657	863.722	1265.56	1270.59
Ahcyl2	5.37667	4.7375	4.93333	4.92333	233.657	191.25	311	328
Ahdc1	9.60667	8.785	13.5033	11.8767	540.333	456.75	1098.66	1023.32
Ahnak	62.06	67.005	42.5033	42.1833	9789.99	9804.74	9717.97	10194.3
Ahnak2	3.35333	4.125	4.39667	8.95	98.3333	111.5	187	404.333
Ahr	2.17	1.8575	1.67667	1.57333	101.333	80	113.333	112.981
Ahsa1	61.4533	54.815	65.5567	50.5833	690.324	569.743	1070.62	870.667
Ahsa2	12.37	11.745	8.52	8.00333	379.333	333.5	379.667	376.324
Ahsg	11.47	8.4775	5.26	4.92667	143.991	98.4931	96	94.3241
AI118078	1.85667	2.355	2.21	1.47	38	44.5	65.6667	46
AI314180	40.4433	40.52	35.5533	31.2233	2030.74	1884.56	2589.26	2402.05
AI314976	14.4733	14.9825	8.48333	5.88667	139.667	134	118.981	87.3241
AI316807	29.0033	25.885	21.5733	15.8267	336	278	362.657	280.333
AI413582	5.55333	5.115	5.57333	10.76	30	25.7431	44	89.2963
AI462493	40.0267	44.9475	40.16	44.4233	283	294	412.667	481.667
AI464131	5.53	5.8925	6.01333	3.82333	195.667	193.5	308	206.667
AI480653	6.87	6.87	6.4	6.3	171.333	158.75	231	240.667
AI597468	4.40667	3.6025	4.11	4.70667	130.333	98.5	176	213
AI597479	8.7	9.055	6.92667	6.22333	255.981	246.736	295.991	280.306
AI607873	4.55	4.6625	2.35	4.13333	143	133.5	107.333	198
AI837181	26.29	25.7675	30.7933	33.4733	342.333	310.5	581.667	667.333
AI846148	7.10667	7.99	9.69667	9.65667	106.324	110.5	210.667	221.324
AI848100	2.82667	2.99	2.07333	2.49	158.991	155.382	168.926	214.333
Aif1	3.31	3.7375	4.64333	11.8833	24.6667	25	49.9907	135.333
Aifm1	39.2267	39.6775	33.33	25.6967	700.991	657.194	866.287	703.657
Aifm2	13.1733	15.775	13.7533	13.29	175.324	194.062	265.741	270.787
Aig1	22.3267	20.695	19.84	16.33	200.296	171.75	258.324	224.315
Aimp1	38.71	40.46	32.83	31.8833	369.667	358.25	454.991	466
Aimp2	23.54	24.14	22.43	24.4967	206.333	195.993	285.333	329.324
Aip	37.39	38.8575	42.3067	45.6567	428.657	412.25	703.667	801.991
AJ237917	34.8233	32.5975	34.7	29.03	1049.32	910.979	1515.31	1340.67
Ak1	306.1	337.033	313.433	203.633	5300.64	5409	7872.97	5399.32
AK122209	2.16	2.2175	2.40333	2.73333	106	101	171.667	205.667
AK122525	2.36667	2.63	2.8	2.6	118.963	122.194	203.935	199.639
AK129128	3.60333	3.3425	3.12333	3.74667	165	142	207.324	262.991
Ak2	23.44	23.835	29	30.0333	347	326.986	623.333	680.639
Ak3	46.3633	50.1325	29.3333	29.47	1085.66	1085.98	996.657	1057.65
Ak3l1	9.52333	8.4175	6.98333	4.45667	329.333	269.25	350.333	236
Akap1	44.9233	54.7775	72.1867	52.69	1495.67	1693.99	3485.24	2683.64
Akap10	5	4.305	3.90667	3.73	163.667	130.743	185.667	187.667
Akap11	7.12333	6.7875	5.43	4.69667	571.333	505.736	631	577.333
Akap12	13.3867	11.96	16.9133	20.3033	705.667	584.993	1293	1640.32
Akap13	13.89	14.8825	15.1767	15.2367	1488.99	1480.73	2357.61	2501.28
Akap2	33.7433	29.5725	33.1833	52.2233	2071	1682	2951.31	4910.32
Akap6	29.36	27.38	32.86	27.9167	2563.94	2218.21	4156.81	3732.81
Akap7	9.29333	7.8375	6.49667	4.21	165.315	129.486	168	114.648
Akap8	17.8433	16.11	13.2067	11.1567	560.981	469.993	603.657	537.324
Akap8l	21.8233	21.4325	20.35	16.83	384.657	350.993	521.657	454.63
Akap9	8.44667	8.6575	6.21333	4.91333	869.991	827.493	928.315	774.981
Akirin1	4.76333	4.3475	2.99333	4.26667	95.9907	80.9861	87.6574	131.991
Akirin2	23.79	23.1975	26.4633	25.2933	348	314.25	561.667	567
Akna	2.36333	1.9375	3.09	4.27333	108.333	82.25	205.306	299.972
Akr1a4	122.2	122.135	119.413	161.623	1446.98	1338.24	2050.66	2931.66
Akr1b10	31.43	31.255	23.24	16.0567	358.639	331.236	384.667	280.315
Akr1b3	14.6067	15.025	13.0533	10.6333	171.667	162.993	222.324	190.657
Akr1b8	2.55333	2.9025	2.66333	5.91	28.3333	29.75	42.6667	100.657
Akr1c14	2.64667	2.4325	1.59	1.53333	55	46.75	48	48.6667
Akr1e1	10.8567	9.89	7.97333	7.89	158.333	133.5	169	176
Akr7a5	40.5733	45.6925	46.9033	32.04	444.333	464	745.296	537.315
Akt1	96.1567	110.09	126.91	156.717	2130.63	2258.69	4080.53	5323.35
Akt1s1	30.2733	33.495	40.7267	41.9033	406.667	416.729	794.296	862.296
Akt2	25.76	24.78	35.5033	25.6667	640.972	571.729	1281.31	978.657
Akt3	6.21333	5.83	4.00333	5.7	250.333	217.243	234	352
Aktip	29.3833	26.15	29.94	19.9067	454.991	375.208	671.88	471.935
Alad	40.23	36.865	43.2467	29.8333	462.324	391.993	720.991	524.648
Alas1	96.1067	117.772	99.7433	92.95	1742.29	1977.97	2623.65	2579.62
Alas2	13.3	14.885	14.9767	16.6933	220.991	227.993	359.324	424.667
Aldh16a1	7.70333	8.17	8.7	10.45	159	156	260.667	330.667
Aldh18a1	3.59667	3.4975	4.7	11.02	105	94.4931	199	493.991
Aldh1a1	14.0167	11.5525	8.24667	7.24667	242.63	184.979	207	191.648
Aldh1a2	1.81333	1.29	2.65	17.2267	33.9907	22.5	72	495.667
Aldh1b1	11.92	18.91	12.8833	13.0233	233.667	341.25	366.667	390
Aldh1l1	2.14667	2.9225	2.55333	1.91667	56.3333	70.7431	97	77.3333
Aldh1l2	3.27	3.2575	1.46	1.09333	165.667	152.75	107.324	84.6667
Aldh2	204.903	197.482	181.63	103.013	3849.78	3436.84	4960.06	2963.71
Aldh3a2	11.83	11.17	10.52	11.7967	315.333	275.993	406.667	481.667
Aldh3b1	1.45667	1.4025	2.25667	4.09667	22.6667	20.25	51	97.9907
Aldh4a1	75.0533	68.18	62.01	30.8133	2066.59	1737.9	2481.81	1298.61
Aldh5a1	15.91	20.9275	16.71	11.1433	297	362	453.324	318.315
Aldh6a1	75.71	78.245	46.0967	24.5533	2092	2002.61	1850.75	1038.62
Aldh7a1	15.94	15.5275	18.8	15.47	412.278	371.66	705.287	612.843
Aldh9a1	16.2767	14.7575	15.64	12.09	392.657	330.243	548	446.333
Aldoa	1216.04	1378.14	1805.19	1845.22	14884.9	15629.4	32048.7	34601.4
Aldob	5.14667	7.335	1.86333	0.25	85.6574	113.493	45	6.33333
Alg1	11.6267	14.0675	12.0133	13.1867	118.556	132.535	178.037	206.046
Alg10b	8.37333	7.69	6.80667	6	265.667	226.25	312.667	291.667
Alg12	4.25667	5.11	3.79667	4.24	65	71.75	84	99
Alg14	8.64	7.2375	4.83667	5.22	67	52	54.3333	62
Alg2	3.86	3.6675	3.27667	3.99	99	87.25	121.667	157
Alg3	6.55667	6.62	8.78	11.2567	78.3333	73.2431	152.324	206.667
Alg5	7.55333	8.1775	6.52667	8.05667	94.6574	94.9861	118.667	154.667
Alg8	1.87	1.7275	1.68	3.26	31.6667	27	41.3148	84.6667
Alg9	4.70667	4.925	5	5.23333	102.657	99.4931	157.972	174.972
Alkbh3	19.9933	25.715	19.58	21.9733	209.63	249.194	297.981	352.315
Alkbh4	2.42333	2.2725	2.24333	2.24333	35.3333	30.75	47.3333	50
Alkbh5	33.96	32.9025	37.9767	32.6567	900.333	808.993	1459.33	1326.33
Alkbh6	18.0133	17.7625	15.9667	14.3167	144.991	132	186.333	176.315
Alkbh7	41.6367	45.4575	45.36	29.45	321.333	324.986	508.333	348
Alkbh8	2.83333	2.8025	2.39667	2.45333	54.6667	50.25	67	72.6667
Alox12	2.01667	2.4225	3.97333	2.60333	51.3333	57.5	146.991	101.667
Alox5	9.38333	5.4275	11.0433	6.10333	225.63	120.5	384.667	224.667
Alox5ap	9.17	10.41	11.9633	22.0267	66.6667	69.5	125.657	245.324
Alpk2	28.63	27.3975	45.03	41.7967	1346.65	1197.49	3067.99	3012.33
Alpk3	35.97	36.2	43.2367	50.54	1948.97	1817.97	3400.64	4200.3
Alpl	18.4167	19.2575	19.02	19.8767	384.657	372.736	576.667	636.667
Als2	4.11333	4.04	4.01	3.91	221.306	200.972	312.667	322.657
Als2cl	6.66	5.555	4.50333	4.45333	287.981	222.229	283.278	295.667
Als2cr4	1.29	1.6525	1.15	2.60667	21.6667	25.5	27.9815	66.963
Amacr	13.01	14.3575	10.9667	7.17667	285	291.5	349.333	241
Ambra1	8.95	8.765	11.0367	11.3233	382.333	346.993	683.333	740.981
Amd1	5.08667	3.325	1.65333	1.53	81	49	38.3333	37.3333
Amdhd2	5.14	6.4825	6.22667	8.31	64	74.7431	112.667	159
Amfr	61.73	62.3275	62.55	71.4267	1932.94	1804.21	2839.56	3424.54
Amigo1	6.41	7.0825	7.49	6.50333	274.667	280.75	465.667	426.667
Amigo2	3.40333	3.0125	2.52333	2.10667	86.3333	70.25	93	81.6667
Amigo3	1.74333	2.065	2.16	1.98	37.6667	41.25	67.6667	65.6667
Ammecr1	3.16	1.865	2.14667	4.02667	83.6667	46	82.3333	163.667
Ammecr1l	6.74	5.4825	5.40333	6.49	194	146.5	226	286.333
Amot	3.28333	2.955	2.97333	6.49333	177.667	148.5	233.333	538.667
Amotl1	19.5367	17.5825	24.1	28.1167	1488.66	1240.25	2660.64	3283.65
Amotl2	23.3233	25.4925	28.7833	22.8367	832.306	844.5	1489.64	1246.97
Ampd2	3.56	3.05	4.07	6.46333	110.657	87.7431	183.657	308.324
Ampd3	12.4533	11.7325	14.24	16.41	432.991	377.493	717.972	873.583
Amy1	5.11	4.4925	1.69333	0.416667	77	63	37	9.66667
Amz2	20.96	18.0325	18.0367	14.86	502.324	399.958	626.324	545.639
Anapc1	12.42	12.1025	12.3533	15.32	668.944	603.465	964.62	1263.93
Anapc11	14.12	14.0725	12.7	12.7733	415.593	383.701	543.306	576.63
Anapc13	182.39	168.365	265.167	212.573	549.333	470	1160.96	980.315
Anapc16	32.7733	37.535	22.6	18.1067	370.648	393	371.657	313.667
Anapc2	21.7067	21.3625	25.7233	29.1067	551	501.993	946.972	1133.28
Anapc4	18.9733	18.3475	16.6033	15.8867	430.981	385.451	546.639	552.935
Anapc5	76.0833	72.2225	68.93	70.1667	1787.18	1570.08	2347.81	2526.07
Anapc7	20.29	22.6525	23.5167	29.24	411	424.972	691.259	907.87
Angel1	2.71	2.5125	2.81333	2.7	89	76.5	134.333	136
Angel2	10.07	9.7975	6.71	6.51333	208.981	188.243	202	206.991
Angpt1	17.52	15.87	15.28	6.42	607.667	510.493	768.667	340.333
Angptl2	45.5	45.375	47.4867	70.7333	1333.66	1230.24	2019.67	3177.66
Angptl4	5.98667	1.51	14.4933	22.7267	94	21.75	326.324	540.991
Angptl7	6.98667	8.5275	5.1	4.41	122.667	137.75	130	118.667
Ank	90.3133	92.555	83.1733	57.7167	2685.98	2555.72	3585.57	2629.96
Ank1	37.4633	32.735	43.2067	30.25	2598.32	2104.74	4348.32	3211.31
Ank2	23.5033	22.885	22.5533	14.9667	1509.57	1362.08	2099.56	1471.94
Ank3	10.9133	11.1225	14.2133	11.7067	992.63	938.944	1871.89	1631.98
Ankfy1	6.02333	6.8925	5.46333	8.97333	411.667	430.736	541.991	937.981
Ankib1	4.27667	3.8775	3.65	5.14	233.667	196.25	289.333	430.963
Ankle2	7.2	7.445	5.73667	6.02667	319.657	306.243	369.315	409.981
Ankmy2	7.85333	8.425	7.80667	7.38333	158.991	158.5	229.324	229.324
Ankra2	7.58	6.955	3.65	4.62	112.963	95.9861	79	105.333
Ankrd1	740.43	1299.63	493.723	2215.19	11124	17953	10785.9	50933.8
Ankrd10	14.99	14.345	8.14667	11.8833	283.333	251.5	224	344.333
Ankrd11	19.94	19.045	19.6667	19.26	1517.98	1343.99	2172.96	2245.62
Ankrd12	3.30333	2.69	1.43333	1.09667	252.667	191	159	128.667
Ankrd13a	14.8167	14.93	17.1167	26.07	410.324	382.736	686.991	1105.99
Ankrd13b	4.42	5.385	5.21333	7.13	125.333	141.25	215	309.991
Ankrd13c	7.90333	6.555	6.39	7.12333	178.333	137	209.324	246.667
Ankrd17	15.9467	15.8475	17.5233	17.1033	1365.98	1257.47	2176.6	2243.63
Ankrd2	0.283333	0.21	0.293333	5.41	2.66667	1.75	4	77.6667
Ankrd23	123.39	136.708	147.62	353.697	2051.62	2104.69	3568.81	9014.33
Ankrd24	2.92667	3.6325	2.09667	1.62667	88.6667	102	92.3241	75.6574
Ankrd27	4.36667	3.8375	4.29	5.76	184	149.736	262.324	371.981
Ankrd28	8.21667	8.835	7.38333	7.82	365.63	365.222	475.963	533.315
Ankrd32	8.46667	8.065	5.72667	3.01	168.667	148.743	165.333	91.6574
Ankrd33b	4.41333	6.955	6.81333	5.66	121	177.25	270.667	237
Ankrd34a	0.83	1.3525	1.76333	2.87667	18.3333	27.75	56.3333	97
Ankrd39	3.56333	4.0275	3.21333	3.89	54	56.5	71	90.3333
Ankrd40	55.9833	57.5175	71.01	70.84	1793.33	1705.99	3298.31	3477.61
Ankrd44	2.85	2.3025	2.42333	2.63	149.667	111.5	183.991	211.657
Ankrd46	19.48	18.5275	13.64	13.7433	404.667	356.222	411.667	437.667
Ankrd49	2.75333	2.5425	2.75	3.01667	41.3333	35.5	60	69.3333
Ankrd50	13.65	11.575	17.7867	15.8333	226	177.5	426.667	401
Ankrd52	14.9	14.6525	21.5833	27.1033	838.62	763.215	1762.63	2337.97
Ankrd54	3.50667	4.8625	4.70667	5.74	56	71.4931	109.324	140.972
Ankrd9	22.44	20.72	12.92	9.50667	489	418.75	408.667	317
Anks1	20.6033	16.8325	22.2867	16.75	990.278	747.91	1553.29	1231.31
Anks3	6.34667	7.4625	3.74667	4.51667	130	140.986	111.657	141.991
Anks6	0.78	0.9075	1.19	2	23.6574	25.5	52.3241	92.6667
Ankzf1	8.03	8.39	7.75	6.68	184.648	179	259.333	235.657
Anln	0.5	0.315	0.586667	4.57	19.6667	11.5	33.3333	274.333
Ano1	3.61	3.4525	3.17667	3.07333	134.648	119.743	172.315	175.657
Ano10	25.4567	21.07	19.5333	12.4033	562.657	430.986	628.324	420.657
Ano6	8.69	7.265	10.1233	15.87	365.991	283.486	617.306	1024.29
Ano8	6.55667	6.195	7.88333	6.31667	337.63	295.979	589.287	498.667
Anp32a	50.6533	47.3075	64	59.1	864.204	747.403	1582.24	1544.21
Anp32b	18.69	19.6	28.7733	47.2967	217.324	211.243	485	842.324
Anp32e	35.2433	31.775	41.39	46.05	844.315	703.486	1436.99	1690.31
Anpep	5.85667	5.8025	8.00333	10.92	167	152.993	330.963	478.593
Antxr1	4.75667	3.4225	4.89	9.86667	213.315	141.5	317.315	679.639
Antxr2	50.29	49.1375	40.5733	32.59	1605.31	1454.42	1876.59	1594.3
Anxa1	13.2033	11.3975	12.0167	28.03	156.648	124.743	206.991	510.62
Anxa11	22.13	18.5675	20.0333	15.1667	447.333	347.5	586.667	469
Anxa2	53.09	41.25	57.3067	156.233	620.981	446.194	972.259	2803.56
Anxa3	16.63	12.295	10.1167	21.1233	221.657	151.75	195.991	432.991
Anxa4	11.7	11.96	12.6533	21.27	196	185.229	306.981	546.648
Anxa5	72.7333	57.9675	85.6	145.87	948.889	700.639	1619.88	2920.03
Anxa6	118.923	127.188	165.847	193.27	2485.24	2461.54	5022.12	6190.39
Anxa7	32.8167	29.645	26.78	35.1867	735	613.715	870.296	1207.62
Aoc3	6.81667	4.685	7.35	10.2333	254.667	162.75	397.667	585.333
Aox1	11.1833	11.435	8.26	5.4	416.954	393.722	446.648	307.981
Ap1b1	25.6733	27.9275	31.6	33.01	861.667	867.215	1536.96	1696.29
Ap1g1	12.1867	12.365	11.0667	13.1067	378.139	354.549	497.361	622.843
Ap1g2	2.03	2.2625	2.11667	3.31333	42.6667	44	64.6574	106.991
Ap1m1	28.0367	27.435	32.6567	30.4933	468.639	424.986	792.306	780.62
Ap1s1	20.0067	21.3025	28.96	41.2167	217.333	213.5	456.324	686.981
Ap1s2	1.97	1.84	1.22667	2.03	53.3333	46.25	48.3333	84.3333
Ap2a1	28.4667	31.27	38.09	45.1767	729.065	741.042	1414.23	1775.34
Ap2a2	28.3867	28.0875	33.6867	36.2867	1106.96	1014.49	1902.94	2170.58
Ap2b1	15.3967	13.9	16.0933	21.9867	708.963	591.743	1073.65	1553.62
Ap2m1	6.13	5.94	4.89667	7.08333	107.324	95.9931	124.333	190.324
Ap2s1	52.2467	56.775	63.4833	83.36	334.296	336.722	589.907	817.213
Ap3b1	11.3833	12.725	13.71	16.61	382.324	395.972	667.639	856.259
Ap3d1	23.4533	26.5475	29.4467	33.8133	943.861	989.674	1719.1	2087.08
Ap3m1	4.85333	3.9225	2.69333	2.72333	128	95.75	103	110
Ap3m2	2.06	2.675	2.10667	2.7	59.3333	70.75	88	119.333
Ap3s2	8.09	8.63	8.85667	7.85333	396.981	391.736	629.963	589.981
Ap4b1	9.99667	8.8925	7.05667	6.79	238	196.236	243.981	247.667
Ap4e1	2.24	2.0425	1.97333	1.97667	124.333	105.25	159.333	168
Ap4m1	3.56333	3.32	4.09667	4.3	49.9907	43.25	83.3333	92.3241
Ap4s1	48.32	42.4	29.3867	17.93	424.981	345.479	375.324	241.648
Apaf1	1.82	1.4575	1.44333	2.34333	101.657	75.25	116.667	200.991
Apba1	1.55333	1.57	1.88333	2.74333	87.6667	81.5	154	237.324
Apba3	37.8467	40.0975	54.6567	43.2267	641.667	628.993	1344.25	1121.91
Apbb1	41.7267	36.2975	44.07	29.1667	921.296	742.986	1410.94	985.278
Apbb1ip	1.89	2.07	4.30333	11.81	34.6667	35	113.991	331.657
Apbb2	12.6433	13.12	14.1967	16.6867	361.611	347.958	588.907	731.639
Apbb3	7.18333	7.2525	5.82667	4.21333	116.963	109.215	137.667	105
Apc	7.05667	6.655	7.20667	8.01	603.074	527.431	892.981	1049.24
Apc2	1.55	2.27	3.37333	3.88667	119.667	162	377.657	459.667
Apcdd1	2.22	2.4325	2.8	5.26667	53	53.75	97	192.667
Apeh	20.0167	23.65	23.54	23.8933	394.981	430.993	673.954	722.278
Apex1	14.4233	13.1975	15.5667	22.0133	37.8889	32.2361	59.3056	88.6296
Apex2	4.02667	2.7575	2.55667	1.81667	64.6481	41	59.6667	44.6574
Aph1a	2.13667	2.2325	2.49333	2.74	44.3148	43	75	87
Api5	8.90667	8.5925	7.73333	8.40333	280.657	251	353.333	405.991
Apip	41.94	42.3075	39.2733	30.5833	319.648	298.993	434.991	356.963
Apln	5.01667	4.32	6.13333	13.8767	134.333	107.25	238.667	569.667
Aplnr	8.65	9.915	17.8467	38.5167	259	274.75	775.333	1774.67
Aplp1	1.39	1.0425	1.37667	2.79	28	19.25	40.3333	86.3241
Aplp2	129.97	120.76	123.66	115.047	3860.11	3321.11	5331.84	5234.2
Apoa1bp	60.5833	56.6975	74.6067	70.53	466.667	404.493	832.963	833.333
Apob48r	0.48	0.4425	1.05333	2.47667	14.6667	12.5	46.6667	116.333
Apobec1	1.74333	2.0725	2.92667	5.72333	33.6667	36.5	81.6667	168.935
Apobec2	147.87	138.673	157.16	119.147	1533.33	1333.99	2363.96	1891.96
Apobec3	5.37	4.5875	3.33333	8.06667	90	70.25	81	206.333
Apod	3.27667	8.0775	2.93	7.69333	52	115	67.3241	185.333
Apoe	371.167	423.698	439.143	670.61	3440.12	3625.31	5906.61	9552.81
Apol10b	2.08333	3.7275	3.10333	4.07333	34.6667	55.75	75	103
Apol9b	0.13	1.8875	0.16	3.06667	1.66667	21	3	59
Apold1	4.42667	2.7975	3.92667	5.31333	123.657	72.75	159.667	227.333
Apool	29.1433	27.9925	19.1067	14.8967	237.991	212.222	226.991	186.315
App	85.42	84.89	100.543	181.137	2268.9	2078.71	3870.48	7377.08
Appbp2	8.36667	7.435	7.59667	8.03	171.333	140.993	225.333	252.333
Appl1	5.28333	4.6425	4.10667	4.40333	312.991	255	353.324	400.667
Appl2	26.8833	26.0175	13.88	9.90667	673.954	603.722	506.315	380.667
Aprt	17.49	17.265	16.4333	23.1933	129	118.25	176	262
Aptx	3.19333	3.4625	2.86667	2.44333	156	156.75	203.324	182.972
Aqp1	247.117	212.09	128.54	97.84	5521.24	4399.16	4175.56	3351.52
Aqp7	11.2033	7.035	16.49	10.9533	224.657	130	478.667	335.324
Aqp8	1.40667	2.5625	1.06333	4.30667	17.3148	29.4792	19	81.3333
Aqr	7.09	7.6675	7.70333	8.33667	293.639	293.486	462.981	528.954
Araf	29.0367	27.3675	23.3533	22.4667	566.833	495.194	662.278	672.222
Arap1	7.28667	6.7675	10.8667	18.5567	393.981	337.743	851.269	1539.56
Arap2	2.15667	2.2675	2.14	1.65333	134	130.25	192.333	156.981
Arap3	19.5067	17.5975	18.8333	23.2533	858.231	716.486	1202.94	1566.6
Arcn1	17.8533	15.8825	15.6867	17.1033	610.648	503.75	777.657	897.333
Arf1	55.7633	51.3925	63.3133	63.7167	815.176	695.208	1341.66	1426.45
Arf2	9.62	8.6275	8.79	10.3367	217.667	180.5	288.667	358.333
Arf3	13.52	12.5475	18.78	27.1067	400.667	343	806	1231
Arf4	26.9333	24.705	16.8733	24.6467	468	395.75	425.333	656.963
Arf5	82.5967	83.33	80.5933	90.8	656.315	611.729	928.963	1104.98
Arf6	20.65	19.3925	26.6933	41.3433	262.667	228	493	806.667
Arfgap1	17.6833	17.05	21.9067	24.0067	351.676	313.583	632.167	732.009
Arfgap2	18.4133	18.025	20.1633	17.5633	429	389.493	681.315	625.991
Arfgap3	5.13	5.775	5.52333	9.09	114.333	119.229	178.333	310.657
Arfgef1	22.0133	18.1475	17.83	12.2733	1319.27	1007.45	1549.54	1126.29
Arfgef2	11.7933	13.3975	15.3767	12.9	882.639	930.438	1668.92	1478.64
Arfip1	6.39333	5.3625	5.49333	6.92	153.009	119.153	190.593	254
Arfip2	9.64	9.0675	8.08	8.97	146.657	127.75	178.667	209.324
Arfrp1	20.85	20.96	18.3233	14.27	401.148	373.181	512.343	420.176
Arglu1	33.6433	31.8625	18.3333	16.7567	490	430.236	388.315	373.648
Arhgap1	8.07667	7.9425	7.92333	10.8167	212	192.986	301.657	435.324
Arhgap10	20.65	24.12	28.6433	29.7	529.278	572.667	1065.21	1167.3
Arhgap11a	0.51	0.825	1.13	4.38	15.6667	23.25	50	204.667
Arhgap12	6.14667	5.7825	5.12	4.22333	263	229.243	318.315	277
Arhgap17	5.67667	6.8875	6.11667	7.87667	161	180.993	252	342.657
Arhgap18	5.16333	4.8025	7.38667	9.16333	158.667	136.972	329.981	431.648
Arhgap20	7.28333	6.6525	6.68333	4.26667	394.657	334.486	524.657	353.981
Arhgap21	16.3967	17.43	19.4	16.62	932.88	919.91	1600.92	1448.19
Arhgap22	1.04333	1.085	1.27	2.33667	23	22	40.6667	79
Arhgap24	7.89667	6.72	9.80333	8.92	217.333	170.75	391.333	375.667
Arhgap25	1.82	1.34	2.01	2.98667	45	30.75	72	113.333
Arhgap26	14.1233	12.9375	11.98	8.13667	949.306	805.965	1166.98	836.944
Arhgap27	9.50333	7.53	6.58333	11.2567	283.991	208.5	285.981	515.981
Arhgap29	18.1533	17.0725	11.9867	12.0533	786.315	685.743	753.657	800.333
Arhgap30	1.59333	1.63	2.75	5.61	60	56.25	150.333	324.333
Arhgap31	16.9933	14.8825	16.5633	19.49	1116.99	903.5	1578	1962.67
Arhgap32	3.21	3.43	4.29	6.08	149.333	148	289	433
Arhgap39	2.88667	2.9275	3.12	3.03667	110	103.5	172.667	177.333
Arhgap4	0.873333	0.5575	1.34667	2.12	23.6481	13.7361	52.6667	87.6667
Arhgap5	12.48	10.845	8.85667	6.62667	551.981	445.743	566.981	448.639
Arhgap8	3.22333	2.0525	2.90667	5.17333	50.3333	29.75	65.963	123.972
Arhgap9	2.17333	2.345	3.02667	4.53667	32.3333	32.25	65.3333	103.333
Arhgdia	69.3567	63.9875	87.4267	142.137	1602.31	1366.24	2927.63	5037.23
Arhgdib	15.83	15.2975	25.4967	47.19	148.324	131.743	345.657	676.315
Arhgef1	22.8533	22.0775	22.6	27.6967	620.898	555.188	891.87	1153.5
Arhgef10	6.39667	4.7525	8.78333	9.57667	297.991	204.743	593.972	683.648
Arhgef10l	17.7167	19.785	27.77	29.25	676.657	700.979	1537.65	1711.31
Arhgef11	9.97	10.2325	10.53	9.83	475.278	451.979	727.898	717.972
Arhgef12	32.7667	29.705	37.87	49.5367	1430.55	1202.56	2397.39	3312.52
Arhgef15	21.2233	19.465	24.13	24.15	746.324	634.486	1231.99	1301.99
Arhgef17	16.7833	17.41	20.6933	19.5867	1464.3	1407.49	2615.3	2615.97
Arhgef18	5.85	6.395	6.81333	8.7	264	266.986	446	600.981
Arhgef19	11.3633	15.73	20.17	14.5267	328.639	421.958	846.963	643.315
Arhgef2	13.2533	13.59	17.5767	26.0567	352.972	334.951	678.62	1063.9
Arhgef3	11.7833	11.15	10.2667	10.3867	359.333	315.25	454.296	485.333
Arhgef5	6.54667	5.99	7.13	9.91333	322.324	272.5	509.306	747.639
Arhgef6	13.2633	12.28	11.76	12.56	515.231	442.181	663.296	747.926
Arhgef7	33.8767	36.245	49.2233	68.5633	1285.64	1272.73	2707.59	3988.91
Arhgef9	4.57667	4.21	3.56667	2.31667	195.324	166.75	220.667	151.667
Arid1a	13.27	13.3725	22.9067	25.6267	922.648	861.965	2308.63	2734.28
Arid1b	5.61667	6.02	8.91667	9.3	543.648	539.236	1248.97	1378.66
Arid2	4.88333	4.6825	4.82667	4.79	347.324	308.486	497.657	521.991
Arid4a	5.17333	5.3475	4.70333	4.36	254.657	244.736	335.667	328.657
Arid4b	4.92333	4.9625	3.95667	3.26333	255.972	238.986	298.296	259.296
Arid5a	2.46	2.5025	2.78	4.98	93	87.75	152.981	288.667
Arid5b	4.93333	5.0825	7.36667	8.20333	188.667	180.243	407.648	480.981
Arih1	25.92	25.6625	36.6	44.7433	508.306	466.236	1040.61	1344.98
Arih2	10.3333	10.2475	9.46333	8.45	331.657	304.979	440.991	415.657
Arl1	22.21	20.405	18.51	16.87	329	280.243	398	382.667
Arl10	5.27333	4.65	5.22667	4.59667	44.6667	36.5	64.3333	59.6667
Arl13b	2.88	1.9925	2.38667	2.48667	85.3148	54.75	102.657	112.667
Arl15	2.68667	2.3	2.05	2.11	75	59.5	83	90.3333
Arl16	2.79	2.9025	2.41	2.52	47.3333	45.75	59.3333	65.6574
Arl2	63.4133	66.11	60.4833	54.6467	469.231	452.146	649.843	618.556
Arl2bp	35.87	34.805	27.0433	28.3433	619.62	557.236	678.259	750.63
Arl3	49.09	48.2825	52.0733	38.98	343.333	312.743	528.667	418.324
Arl4a	5.82	4.805	3.49333	2.4	188.667	144.25	164.333	119
Arl4c	2.44	2.2625	4.39	9.78667	82.3333	70.5	214.667	507
Arl5a	7.81	7.3825	5.99333	6.17333	346.333	303	385.333	419.657
Arl5b	2.73	2.22	2.31	2.35667	83.3333	63	102.657	110.333
Arl6ip1	13.63	11.8575	13.4733	27.0867	239.306	191.993	342.639	728.306
Arl6ip4	23.9867	26.385	26.7967	25.37	241.296	246.243	391.306	390.991
Arl6ip5	78.6067	66.4175	88.9	93.2367	895.963	699.972	1469.27	1627.93
Arl6ip6	3.81667	3.3725	2.98333	3.31667	75.6667	62	86	100.667
Arl8a	17.26	16.8475	19.21	24.06	249.991	225.5	403.981	534.546
Arl8b	29.4033	27.7275	21.12	19.86	732.639	639.222	763.574	758.185
Armc1	13.6033	12.95	10.5733	9.64	339.324	299.486	382	368.324
Armc10	3.44	3.5575	2.65667	3.04333	59	56.25	66	80
Armc2	9.09333	7.525	5.06667	1.87	401.991	307.743	326	126.333
Armc5	5.33667	5.43	7.19333	9.26667	171.333	161.5	335	455.657
Armc6	4.25333	4.7025	3.78667	3.79667	72.6667	74.25	94	99.6667
Armc7	1.1	1.26	1.75	3.09667	20.6667	21.75	47.6667	89
Armc8	9.47667	8.9375	8.25667	8.07333	235.991	206.493	298	307.657
Armcx1	1.73333	1.7125	1.89667	2.17667	34	31.25	54	65.3333
Armcx2	3.52	3.56	3.86	6.92333	106.333	100	168.991	321
Arnt	14.25	15.0425	16.9133	19.2267	409.991	401.486	705.324	847.296
Arntl	0.59	0.52	3.52	3.68333	14.6574	12	126.324	139.657
Arpc1a	33.0867	32.585	23.3933	23.06	447.324	407.924	459.278	477.954
Arpc1b	24.7967	23.2975	33.4167	69.0667	311.611	270.382	609.444	1331.4
Arpc2	70.9	68.5125	75.7333	105.183	963.898	861.708	1492.81	2191.98
Arpc3	77.06	77.0175	72.11	108.367	556.231	514.09	755.861	1198.8
Arpc4	29.27	28.715	31.5067	49.76	366.981	332.236	572.648	956.991
Arpc5	13.4433	11.6275	11.0333	18.99	204	163.243	243	441.333
Arpc5l	50.2133	51.9	39.82	37.35	543.324	520.486	625.278	618.593
Arpp19	16.1767	15.3625	15.0767	14.26	555.315	488.493	750.981	749
Arrb1	7.43	7.3175	9.42	14.44	449.963	409.229	825.62	1340.41
Arrb2	7.79667	8.685	12.3233	23.19	114.611	117.229	262.574	522.37
Arrdc1	3.33	3.035	2.84667	4.12	44.6667	37.5	55.3333	84.6574
Arrdc2	30.8967	15.87	6.64333	4.44	618.333	295	193.333	135.333
Arrdc3	12.1667	10.26	9.22	10.41	423.333	330.25	465.667	555.667
Arrdc4	2.67667	2.605	4.05	5.01667	90	81.5	197.333	258
Arsa	5.79333	4.775	5.95	10.0167	171.991	131	255.991	455.324
Arsb	4.09667	4.045	5.17	9.14333	139	127	254.315	475.648
Arsi	0.16	0.4425	0.99	2.95	2.33333	6	21	66.3333
Arsk	2	1.54	1.29	1.50333	53.6667	38.25	50.3333	62
Art1	192.373	212.258	143.063	115.25	2319.66	2370.75	2506.32	2128
Art3	211.58	182.508	157.23	78.3233	2469.63	1974.67	2665.13	1400.65
Art4	14.24	13.375	9.16	5.03333	289	251.25	269.667	156.333
Art5	13.29	13.22	8.47667	4.53333	209	193.236	193.648	109
Arvcf	6.35	7.7175	8.79	10.6933	237.398	267.542	476.25	611.889
As3mt	33.8333	30.9075	26.6633	16.45	504.333	426.743	576.963	375.315
Asah1	15.7633	13.965	9.81	13.7433	289.639	237.993	261.315	387.315
Asah2	4.69667	4.28	3.72333	4.93333	192.667	162.743	221.657	309.657
Asap1	8.08	7.02	9.13	13.06	314.972	253.222	516.296	780.63
Asap2	5.72	4.6225	7.73667	11.6933	228	170.993	447.315	713.972
Asap3	5.82333	5.615	9.62667	11.7133	191.333	170.75	458.63	588.991
Asb1	5.34	5.17	5.07333	4.51667	275.991	247	380.324	358
Asb10	55.2333	65.8325	63.49	41.5733	1089.67	1203.49	1818.31	1256
Asb11	78.09	73.2575	56.81	37.49	838.333	729.243	886	616.324
Asb12	7.86333	7.56	6.46667	6.79667	84.3333	75	100.667	111.667
Asb13	7.01667	7.975	5.89333	4.83	141	147.5	172	148.333
Asb14	54.7533	56.3275	31.2233	14.7433	933.648	890.194	773.333	384.324
Asb15	24.4833	29.1175	20.7733	9.18	434.972	480.486	535.657	249.667
Asb18	7.78	8.2275	10.4633	7.84	93	91	181.333	143.333
Asb2	228.307	316.973	246.433	175.977	5227.9	6712.64	8183.9	6170.91
Asb3	2.26	2.0125	1.89	1.78333	62	51.25	75.3333	74.9907
Asb4	1.73667	1.355	2.37	1.42333	48.6667	35	96	61
Asb5	15.8233	12.0925	8.62667	8.15333	212.667	150.25	168.333	167.657
Asb6	6.53667	6.9	6.73	7.86333	117.667	114.5	175.667	217
Asb7	1.46667	1.905	1.82667	2.07333	36	43	65	78
Asb8	46.63	45.2125	35.6567	29.08	836.324	751.25	928	799
Ascc1	17.7133	17.705	20.6467	16.4	218.63	202.493	369.63	310.324
Ascc2	7.41	7.9075	10.9233	13.67	164	161.993	351.333	463.926
Ascc3	2.39667	3.0225	2.12333	2.79667	152.333	175.75	195.991	272.333
Asf1a	6.07333	6.1975	4.15333	3.59	113.333	107.25	112.667	102.657
Asf1b	0.76	0.7075	1.33667	4.11	10.3333	9	26.3333	85.6667
Ash1l	10.4	9.8775	9.37333	8.33	997.324	879.215	1303.66	1224.3
Ash2l	13.6933	14.435	13.9533	13.49	293.324	286.243	433.63	443.333
Asl	3.78	3.575	3.70333	5.58667	57.3333	50.25	81.3148	129.991
Asna1	40.95	44.03	51.0633	56.2067	436.639	433.736	790.62	918.278
Asns	1.13333	0.9075	1.15667	4.07333	18.6667	13.75	27.3333	102
Asnsd1	33.2467	29.85	22.8333	21.79	668.306	555.486	665.324	671.648
Asph	28.13	26.3125	31.4667	29.8367	1410.52	1222.67	2288.16	2290.44
Aspn	6.04333	5.5875	4.6	18.7267	116	99	128.333	553
Aspscr1	17.5333	17.9825	15.7833	19.1233	264.657	250.743	346	442.667
Asrgl1	23.43	28.715	23.1067	20.4467	453.296	515.479	648.63	605.657
Asxl1	7.96667	8.42	11.4033	10.0933	452.63	444.486	938	878.546
Asxl2	4.54333	4.4375	4.86667	4.56667	168.333	152.75	261.333	258.991
Atad1	30.91	27.2575	24.1967	19.36	739.667	605.493	840	709.648
Atad2	0.763333	0.83	0.763333	2.85667	37	37.2431	53.3333	211.657
Atad3a	17.5633	21.9425	22.6333	17.87	360.944	417.41	674.935	561.639
Atcay	2.89333	2.6425	2.50333	1.79667	90.6667	76.25	114	86.3333
Ate1	11.3333	11.8325	10.2167	9.31667	460.667	446.493	601.602	580.639
Atf1	10.8167	10.795	10.7333	11.0033	214.324	197.972	308.657	334.333
Atf2	8.78333	8.1475	7.88667	6.43333	319.657	274.479	415.991	358.648
Atf3	4.26333	2.12	2.24667	3.46	71.6667	32.75	55	89
Atf4	30.5533	32.655	23.9333	29.3467	448.63	442.236	511.287	659.306
Atf5	32.7433	35.075	57.75	83.9033	463.991	457.5	1186.31	1819.32
Atf6	19.8833	21.825	21.6033	22.4	1262.66	1285.97	1989.65	2178.63
Atf6b	9.83667	9.2875	13.1733	17.6767	214.648	187.743	417.333	591.639
Atf7	4.84	4.4375	6.62333	7.61667	117.611	100	233.324	283.657
Atf7ip	14.8067	14.5575	20.9	20.5367	570	518	1165.63	1210.97
Atg10	11.7333	11.285	7.81	5.20333	160.667	143.243	155.333	109
Atg12	11.35	12.4275	8.81	8.33667	237.657	241.5	267.324	267.324
Atg13	20.68	20.6	20.0533	19.3967	593.62	548.09	835.361	851.731
Atg14	5.30333	5.76	5.72333	4.73	154.657	155.75	242.296	211.333
Atg16l1	14.3133	15	12.8933	10.74	373.306	361.965	488.935	429.296
Atg16l2	3.82	3.445	2.79333	2.03667	88.3333	73.9861	94	72.3241
Atg2a	11.78	13.02	17.0233	14.1133	635.963	650.972	1330.94	1167.29
Atg2b	4.58333	4.5925	4.81333	4.85333	396.981	368.743	604.648	643.954
Atg3	10.3533	9.63	10.0633	10.1067	177.333	152.486	249.991	265.306
Atg4b	7.09667	9.895	8.53667	9.79333	178.991	231.236	312.315	378.324
Atg4d	30.81	32.86	43.2967	34.0667	459.991	454.243	936.981	778.981
Atg5	6.11333	6.1925	5.65667	6.24	122.333	114.75	164.333	191.333
Atg7	7.41333	7.55	8.37667	8.81	193	181.993	316.306	351.657
Atg9a	36.0733	39.235	42.7467	39.7833	1221.66	1231.46	2099.59	2065.25
Athl1	3.04	3.3675	3.57667	4.78333	77	78.25	131.657	185.667
Atic	14.9867	15.8175	17.6867	19.4267	330.657	322.75	565.944	656.972
Atl2	16.08	13.5175	11.01	8.16	494.657	385.25	491.648	384.333
Atl3	5.38667	4.4125	4.30667	7.66667	129	97.5	149.667	281.333
Atm	2.08333	2.025	1.48333	1.44667	170.667	153.736	176	180.981
Atn1	19.1233	18.5525	33.2067	40.63	715.667	643.5	1801.99	2332.66
Atoh8	8.63333	6.885	6.00333	8.74667	173	127.5	175	268.667
Atox1	72.2367	79.5625	54.55	77.91	269.333	273.958	295.667	445.667
Atp10a	1.03667	0.8875	0.886667	2.81667	41.3333	32.5	51.3333	172.991
Atp11a	27.7433	27.55	34.6233	37.85	868.954	798.993	1570.94	1816.63
Atp11b	6.97333	6.4825	5.08	4.73	288.667	248.979	304.981	299.981
Atp11c	2.09	1.7875	1.1	1.22	107.333	84.75	82.3333	96.3333
Atp13a1	9.96667	10.1325	11.3533	14.4567	326	306.743	538.296	724.639
Atp13a2	9.54	10.0575	10.9833	15.6067	316.981	308.729	529.333	794.972
Atp13a3	7.78333	5.94	5.73667	7.81333	482.972	341.5	515.972	742.981
Atp1a1	382.56	266.047	414.863	379.223	11440.1	7359.92	17989.2	17379.3
Atp1a2	223.153	261.848	303.027	261.653	11827.8	12847.2	23305.9	21241.3
Atp1b1	136.187	131.982	156.413	183.687	2775.17	2488.66	4619.33	5739.95
Atp1b2	12.0467	10.0175	12.8167	9.70667	303.324	234.25	468.333	374.991
Atp1b3	23.7633	21.7375	25.34	31.76	370.648	312.736	573.306	759.278
Atp2a2	4283.86	3894.28	4342.96	2825.19	145248	122297	213577	146588
Atp2a3	6.33667	6.1925	9.22	10.2567	242.991	219.986	511.648	602.306
Atp2b1	14.2333	12.195	15.8067	16.5833	576.667	458.5	928.315	1030.65
Atp2b4	7.01667	6.14	9.22333	12.4333	218	176.5	415	591.667
Atp2c1	12.38	12.415	9.81667	10.35	509.657	473.736	586.648	652.63
Atp5a1	2080.78	2300.49	1818.51	1193.73	43076.3	44148.1	54642	37822.8
Atp5b	3361.1	3635.29	3228.19	2132.1	53755.6	53906.3	74956	52188.8
Atp5c1	748.59	747.075	577.787	377.43	6886.88	6370.21	7716.32	5316.79
Atp5d	811.223	921.672	819.367	703.263	6035.72	6350.51	8852.35	8017.36
Atp5e	1277.93	1243.34	802.373	528.743	4501.21	4057.42	4106.49	2851.84
Atp5f1	276.287	294.938	244.087	171.617	2941.02	2910.9	3773.88	2794.58
Atp5g1	8.60667	8.5175	12.4733	9.43333	342.324	314.486	720.648	575.657
Atp5g3	2120.67	2194.57	2021.46	1424.17	12256.6	11739	16975.7	12604.4
Atp5h	224.877	218.005	235.74	156.893	1098.8	985.951	1672.58	1173.8
Atp5j	820.297	764.907	618.227	443.91	2995.41	2586.99	3279.69	2480.55
Atp5j2	1134.43	1218.34	1145.51	925.083	4605.47	4583.45	6756.99	5751.56
Atp5k	1102.58	1111.58	1568.04	1231.27	2739.58	2558.92	5664.62	4684.95
Atp5o	892.117	939.195	1063.66	783.85	5863.6	5709.1	10140.8	7888.94
Atp5s	11.71	10.97	4.71667	3.29667	147.991	128.486	86.6574	63.6667
Atp5sl	19.5167	19.7125	18.0333	14.32	396.972	370.938	532.963	445.972
Atp6ap1	74.4067	65.615	61.46	69.9867	1335.99	1089.47	1602.31	1926.97
Atp6ap2	7.45333	6.885	6.55667	8.79	138.333	117.993	176.657	250
Atp6v0a1	29.96	32.07	38.1	40.7867	1019.94	1012.22	1880.33	2129.56
Atp6v0a2	15.86	15.535	19.1433	19.43	474	429.75	829.324	889.981
Atp6v0b	70.8233	64.8	47.4733	50.27	600.333	508.243	584.657	653.296
Atp6v0c	18.5467	19.24	11.91	13.71	181.667	174.993	169.333	206
Atp6v0d1	30.9233	32.2475	26.2967	28.5367	425.62	411.715	525.296	602.315
Atp6v0e	41.7267	40.2	26.6867	34.3067	282.991	251.979	262.981	356.565
Atp6v0e2	9.45	9.4425	9.27333	6.76333	143.657	133.5	204.333	157.333
Atp6v1a	7.19667	6.8	7.25333	10.2767	241.657	211.25	353.306	529.278
Atp6v1b2	31.8733	34.7875	25.5167	30.4667	727.306	734.465	844.954	1066.94
Atp6v1c1	25.3867	25.8975	21.0367	21.1533	321.306	304.472	386.324	409.981
Atp6v1d	45.3	46.8625	41.2933	39.75	543.926	519.715	719.287	730.306
Atp6v1e1	85.5033	86.2225	50.3067	44.03	876.278	817.688	748.556	690.611
Atp6v1f	41.92	45.9975	38.52	41.0867	226.667	229.25	302.667	340.333
Atp6v1g1	23.4	25.405	21.31	19.68	203.287	204.722	268.611	261.926
Atp6v1h	11.3767	11.3325	9.07	11.9567	191.333	176.743	221	308.306
Atp7a	1.92667	1.6925	2.04667	2.67667	79.6667	65	122.667	169.667
Atp8a1	10.8167	10.9825	7.13333	5.32667	758.963	714.215	725.981	572.648
Atp8a2	2.94667	3.17	3.05333	4.39333	92.3333	92.5	138.648	210.981
Atp8b1	1.41333	1.215	1.28	2.58	77.3333	61.5	101.657	216.639
Atp8b2	5.55667	4.9475	6.82667	12.5467	269.639	221.986	480.315	933.62
Atp9a	33.8733	31.575	50.5333	73.85	1017.64	876.479	2198.22	3402.2
Atp9b	8.62	8.6125	9.03	10.15	327.333	302.75	497.333	591.324
Atpaf1	5.91333	7.635	6.58	6.02667	108.333	129.243	175.333	169
Atpaf2	18.0067	19.4075	16.5333	13.9333	271.333	271	361.667	321.324
Atpbd4	2.68333	2.825	2.19	2.18	61.6667	60.2431	73	76.6481
Atpif1	209.503	236.193	195.44	211.43	928.574	970.146	1258.57	1437.27
Atrip	4.56667	4.705	4.52	4.68	99.3333	95	142.667	155.991
Atrn	6.62	5.9725	6.14	6.21667	492.306	412.236	662.333	708.287
Atrnl1	7.07667	5.82	6.05333	6.75667	396	301.236	490.306	579.657
Atrx	11.1967	9.7675	7.24333	6.77333	731.315	592	685.611	678.981
Atxn1	4.37667	4.34	4.4	4.41333	202.333	185.986	295.324	312.333
Atxn10	35.2733	36.8025	29.56	32.7033	727.907	703.382	884.796	1035.44
Atxn1l	5.05333	4.54	5.73667	7.92333	323.667	270	532.657	777.333
Atxn2	17.1367	18.335	21.5767	20.0867	652.306	645.951	1191.27	1171.27
Atxn2l	19.2467	20.965	27.15	32.38	608.954	614.715	1247.9	1570.57
Atxn3	2.58333	2.4425	1.73667	1.87667	102	89.75	99.6667	113.333
Atxn7	5.39	4.6675	4.91333	4.42667	165.657	132.493	219.324	208.333
Atxn7l1	5.83	7.0125	5.31333	5.13667	79.6667	88.25	105.333	107.667
Atxn7l3b	11.2533	9.1875	8.36333	9.47667	344.667	260.25	371.667	445
AU019823	2.07	2.5	1.64	1.50333	53.3333	59.2431	61.3241	59
AU021092	3.17	3.2575	2.85667	3.55333	36.3333	34.75	47.6667	62.3241
AU021838	5.58333	5.4975	6.00333	5.62333	81	74	126.333	125
AU022252	6.08667	5.82	7.78	9.53	40.3333	35.75	75	96.6667
AU022870	13.35	14.2025	11.2967	11.9533	201	197.486	246.63	275.963
AU040320	13.5433	13.9825	17.7933	17.64	451.981	432.458	862.602	902.259
AU040829	10.2633	11.5725	14.96	15.18	352.991	368.493	745.917	800.935
AU042671	6.78333	7.5175	7.86667	6.02667	838.972	862.986	1412.27	1141.97
Auh	54.5367	57.2275	51.41	32.19	624.287	607.458	854.954	564
Aup1	31.5333	31.95	34.32	37.7167	405.63	380.743	641.269	743.593
Aurka	0.41	0.4275	0.723333	5.33667	6.66667	6.5	17	132.333
Aurkaip1	82.4233	88.7225	68.8167	58.93	556.324	553.25	673.648	608.963
Aurkb	0.236667	0.2325	0.6	6.19667	4	3.5	14.3333	157.991
Auts2	5.17667	5.9475	11.8033	9.95667	266.972	285.958	882.611	786.611
Aven	11.9	11.935	13.08	10.96	124.667	115.75	199	176
Avpi1	10.67	9.7625	9.25	10.6267	88.6667	75	111.667	135.333
AW011738	3.84667	6.265	4.04	5.94	93.6667	139.25	143	220.667
AW112010	12.8	15.6125	6.16667	9.69333	84.3333	93.5	59	97.3333
AW124722	9.53	11.04	10.6267	7.08333	192.333	206	311.333	218.667
AW209491	4.26	4.02	3.75	3.57333	104.667	91.5	133.667	134.333
AW549877	8.25333	7.99	4.22333	3.55667	357	320.743	265.333	235.981
AW555464	3.29667	3.73	5.13667	5.27333	184.657	193.486	416.657	453
Axin1	7.79667	7.5225	9.22667	10.1567	247.333	221.236	424.981	494.639
Axl	30.6267	33.1325	46.0233	84.13	1073.33	1063.42	2336.82	4520.31
Azi1	4.37333	5.54	6.43667	5.68	133	155.75	283.333	264
Azi2	16.0433	14.65	15.31	14.1067	473.333	399.743	654.657	635.991
Azin1	17.8967	15.4875	12.9467	18.3033	741.324	593.486	777.981	1162.31
B230118H07Rik	22.22	19.225	17.2833	12.36	428.917	343.451	484.306	365.648
B230120H23Rik	10.1733	9.255	8.09667	7.56667	276.63	233.146	319.602	314.546
B230208H17Rik	30.63	36.6025	36.1433	34.8867	822.315	909.736	1407.31	1434.97
B230219D22Rik	17.0733	13.975	11.4567	10.6033	676	512	658	643.333
B230312A22Rik	12.7033	14.01	12.2967	14.5667	320	327	449.667	563.333
B230315N10Rik	3.02333	2.9725	2.49333	2.71	52.3333	47.75	62.6667	72
B2m	297.577	293.76	455.31	729.2	2171.81	1933.65	4799.35	8115.81
B3galnt2	7.67	7.1575	5.47333	5.18667	219.333	189.5	227.333	226.991
B3galt2	2.5	2.68	2.28	2.01	94	93.9931	124.667	116
B3galt4	1.79667	1.93	2.06333	3.06667	24	23.75	40	62.6667
B3galt6	1.86667	1.8925	1.97	2.11333	33.6667	31.5	51.6667	58.6667
B3galtl	2.76667	2.34	2.21333	2.50333	106.991	83.7431	124	148.324
B3gat3	22.2567	22.6175	23.9633	25.42	300	282.25	468.667	525.657
B3gnt1	28.85	28.3225	29.3933	24.62	499.667	452.75	738.667	653
B3gnt2	6.13	5.9925	6.28333	7.94	135.38	122.986	200.88	268.509
B3gnt3	5.12	5.0025	5.73667	11.88	91.3333	82	148.333	324.333
B3gnt8	2.53667	2.22	2.38	3.55	40.3333	32.75	55	86.6667
B3gnt9-ps	2.23	2.0475	2.46333	4.09333	36.3333	30.75	58	102.333
B3gntl1	2.25333	2.975	2.55667	2.13667	39	47.75	64.3333	56.6667
B4galnt1	1.44	1.2	3.28333	7.82667	29	22.5	95.3333	241.667
B4galt1	27.6067	26.5425	29.4467	39.0433	933.991	829.5	1444	2025.28
B4galt2	3.51667	3.6975	4.88667	7.82	72	69.75	144.667	246.324
B4galt3	8.43	7.6975	8.28333	9.14333	139	117.708	198.667	230.972
B4galt4	8.16	5.7975	5.93	6.30667	144.667	94.7431	152.333	171
B4galt5	4.72667	5.08	6.92	11.9533	169	167.75	359.333	655.657
B4galt6	5.25667	5.6575	7.54	7.45333	197	196.75	409.611	428.315
B4galt7	5.72	5.6675	6.18667	6.62333	77.6667	71.5	121.657	137.991
B630005N14Rik	3.59667	3.4325	2.82	2.68	118.667	105.25	135.324	135.667
B930041F14Rik	1.63333	1.575	1.16667	2.07333	28	25.25	29	54.6667
B9d1	3.84	4.305	5.24667	7.32667	25.6667	26.5	51	74.9907
Bace1	14.4133	13.8725	16.8767	21.83	502.657	447.236	853.306	1166.32
Bace2	3.02667	2.975	3.41	4.60667	95.3333	86.5	156	222.667
Bach1	9.35333	10.1775	7.97667	7.74667	466	470.75	576.333	591.991
Bad	10.0867	10.7325	9.96667	12.4467	124.667	123	179	235.333
Bag1	134.67	142.25	183.077	171.273	1459.24	1427.14	2876.58	2842.97
Bag2	19.6233	18.5875	16.9433	24.6367	303.333	265.5	380	582.333
Bag3	136.5	150.303	128.987	142.763	2790.31	2840.97	3824.92	4471.88
Bag4	1.86	2.14	1.82	1.80667	76	81	107.667	113
Bag5	13.22	12.265	12.8033	13.44	198.954	171.417	279.593	309.648
Bahcc1	2.2	2.8125	5.18333	4.62	115	136.75	393.648	370.657
Bahd1	7.26667	8.605	7.93667	7.58	273.667	299.75	434	437.991
Baiap2	4.06333	5.36	4.1	7.69667	78.3333	93.7431	114.333	226.324
Baiap2l1	7.37333	7.5375	6.18333	5.16333	200.657	190.486	244.278	215.287
Bak1	13.7133	12.5275	18.8933	40.19	233.667	197	466.667	1049
Bambi	3.25667	4.78	2.86667	3.80333	139.667	190	179	250
Banf1	61.02	61.5775	52.09	60.42	426.333	398	528.667	647.667
Banp	6.50333	5.58	3.62667	4.98333	124.667	98	100.981	146.648
Bap1	19.6533	20.3025	20.66	19.32	569.796	544.667	868.463	857.87
Basp1	0.693333	0.9725	2.39	9.39333	4	5.25	20	83.6667
Bat1a	38.65	35.125	35.1967	34.3433	937.648	788.243	1239.33	1275.33
Bat2	51.2433	44.64	80.9367	87.87	2933.91	2366.21	6709.47	7715.45
Bat2l	36.1267	34.25	47.8333	44.1667	2579.63	2265.47	4945.59	4834.27
Bat2l2	9.91667	9.66	8.92	10.2767	881	795.694	1150.99	1397.98
Bat3	76.46	77.5125	106.63	101.74	2346.51	2202.26	4742.37	4785.02
Bat4	3.38667	3.89	4.12667	3.82	37.3333	39.75	66	64.3333
Bat5	37.7633	39.8475	39.7767	38.9367	625.25	609.951	956.241	987.287
Batf2	0.686667	1.49	1.29667	3.65	8	15.5	22	64.6667
Bax	18.3433	20.1275	20.65	33.3033	135.667	137.25	222	377.333
Baz1a	1.32333	1.22	1.32667	2.22	71.6574	61.25	104.333	185
Baz1b	18.5367	18.285	17.4667	20.89	762.648	696.222	1042.3	1317.28
Baz2a	8.34	8.4075	8.89	9.08333	593.648	553.75	918.63	990.972
Baz2b	5.30667	4.76	4.62	3.89	352.657	293.5	445.657	395.657
Bbc3	1.56667	1.725	3.15333	3.83333	25.6667	26	74.6667	96
Bbs2	6.16667	6.2475	4.33333	1.87333	154.667	144.993	157.981	71.9907
Bbs7	2.43	1.9525	1.54667	1.33667	53.6667	40.25	49.6667	45.3333
Bbs9	2.92	3.215	2.12	2.13333	80.3333	81.7986	84.6481	89.7407
Bbx	3.08333	3.0525	2.57	2.91667	89.6574	82.7361	108.333	129.981
BC002199	11.3867	12.795	11.33	9.46333	231.657	240.75	334.824	294.944
BC002216	2.32667	2.5675	3.25333	3.84	52.6667	53.7431	107.333	133.324
BC002230	5.10667	4.6725	6.98333	5.39	161.333	136.75	319.333	260.667
BC003266	30.1133	30.205	32.08	28.68	262	243.5	405	382
BC003324	5.44	6.47	6.39	8.67	58.3241	64.25	99.3333	142.657
BC003331	10.52	10.1925	7.27	7.94333	275.667	247.236	276.667	319
BC003885	5.65667	5.1	4.86	3.75667	73.3333	61.25	91.3333	74.3333
BC003940	31.1733	34.6625	35.3533	47.0633	319.657	328.979	526.333	740.981
BC003965	10.1133	10.2925	7.74667	6.44	275	258.75	306	268.667
BC003993	2.01333	2.3675	2.27	2.11	56.3241	60.9931	92	90.3333
BC004004	65.52	67.9475	67.07	49.5333	1456.28	1395.98	2162.54	1686.55
BC004022	6.31	6.5225	6.61333	7.97667	370	352.75	562.333	715.324
BC004044	6.60333	6.965	8.94	11.8267	167.667	163.75	328.991	460.324
BC004728	8.00333	8.445	9.34667	13.0067	78	75.9931	132.333	194
BC005537	57.9833	63.5775	46.8367	51.2667	1258.32	1276.75	1475.31	1705.96
BC005624	13.8	11.9575	14.0333	14.2967	149.333	119.75	220	236.981
BC006662	11.0867	13.975	10.3667	9.48667	94.4352	110.562	127.926	123.481
BC006779	6.04333	7.97	5.34667	10.3433	519.667	618.5	669.991	1354.99
BC008155	30.8933	36.6425	30.7867	22.79	208.657	228.75	302	236
BC008163	9.33333	9.385	6.95667	6.4	126.991	118	137.333	133.667
BC010304	36.2067	33.1925	45.2333	60.4767	1515.6	1285.21	2747.61	3881.57
BC010787	61.0033	63.0425	61.94	42.34	407.667	387.993	600.667	432.667
BC011209	2.75667	2.0125	2.88667	1.58	80.6667	54.75	122.667	70.6667
BC011248	9.37333	10.0475	8.75	9.19	96.6667	95.9931	131	145
BC013529	41.1	42.2475	37.9633	31.6267	543.574	515.958	728.509	640.583
BC013672	0.83	5.4775	0.703333	2.47667	42.3333	244.986	52	190.991
BC013712	1.72667	1.8025	2.97	7.22333	37.3333	35.5	93	238.667
BC017158	3.7	3.6075	4.17	5.7	61.6481	55.75	101	145.667
BC017612	20.99	20.735	24.2533	19.66	170.333	155.5	286	244.667
BC017643	5.35	5.86	4.25333	5.84333	105.333	106.25	121.333	176
BC017647	7.14333	6.815	8.72	9.00333	165.667	146.25	293.333	319.667
BC018242	2	2.125	1.80667	2.87	44.3333	43.5	58.3241	97.9815
BC018371	5.99333	3.5225	7.33333	7.32333	156.657	85	278	292.667
BC018507	11.16	10.4175	9.07667	8.03333	724.981	625.236	857.333	799.667
BC019943	3.71333	4.4075	4.13667	4.02	75.0093	82.3819	121.287	124.463
BC020002	7.35	6.6875	5.46667	4.92	231.667	195.75	249.333	237.333
BC020489	0.17	2.03	0.303333	2.81333	2.33333	24.2431	6	58.3333
BC020535	14.83	12.7975	9.26	10.61	286.657	228.736	260.324	313.657
BC021381	9.79667	9.365	4.95333	4.11	361.667	320	266.306	232.667
BC021395	6.23333	5.7525	5.82	4.22333	227.991	194.243	308.981	236.981
BC021438	7.87333	8.44	9.86333	9.80667	120.63	119.542	219.167	230.093
BC021523	17.0233	16.54	16.4833	8.84333	581.102	524.167	817.917	462.204
BC021611	15.85	17.135	17.0333	14.7167	297.667	298.25	465	423
BC022224	66.12	76.5025	64.1833	39.9633	789.991	848.222	1114.99	731.648
BC022593	4.63667	4.58	4.84667	4.07	73.3333	67.4931	111.324	98.6667
BC022623	13.28	13.3075	20.8067	22.15	342.667	317.25	778	876.333
BC022687	1.67667	2.5175	1.62	2.35667	27.3333	38.25	38.3333	58.6667
BC023744	1.41333	1.905	1.99	2.82333	20.3333	25.4931	41.6667	62.3333
BC023814	5.33667	4.8275	3.6	2.78667	86.6667	72.5	85	69.3333
BC023829	9.92333	10.1225	10.8367	10.7567	168	158.75	265.972	279
BC023892	5.35667	4.8275	3.15667	4.77	251	208.25	214.333	341.667
BC024479	3.06	2.7475	1.78667	1.42667	60	50	51	43
BC024659	9.15333	8.455	6.99667	6.00333	349.333	299.25	387	351.333
BC024814	21.41	20.8375	21.6733	20.1867	239.333	215.5	351.648	345.657
BC024868	35.9667	41.835	49.0467	46.9233	909.963	978.493	1799.94	1817.25
BC025076	2.21	1.9425	2.45	3.00333	37.6667	30.5	60.6667	79
BC025575	2.18333	2.0875	3.74	7.95333	57.6667	51.25	143.324	322.333
BC025816	2.57667	2.635	3.54667	4.51333	47	44.25	93.6667	126.324
BC025833	16.6833	11.75	12.43	6.52333	293.657	190.743	318.324	175.324
BC026585	8.72	7.7175	7.07667	7.06667	95.6574	78.25	112.667	118.981
BC027057	0.773333	0.625	1.21667	2.81	21.9815	16.25	49.963	122.333
BC027061	7.77667	7.55	5.05667	4.76333	94.6481	85	89.3333	88.6574
BC027231	2.14667	2.5175	1.72	1.93667	49.6667	53.75	57.6667	68.3333
BC028440	6.48333	7.395	5.84	5.06333	56.3333	59.5	73.6667	67.3333
BC028528	5.26333	5.4775	5.19667	10.0667	32.9907	31.75	47.3333	96.6667
BC028663	8.89333	9.8475	11.7167	5.84	67	68.75	128.333	67.3333
BC029169	2.15667	1.9825	2.36667	4.73	46.6667	39.5	74.3333	157
BC029214	10.5867	12.4925	6.74667	7.72667	88	96.5	81.3333	98.3333
BC030046	2.73333	2.785	3.78	5.76333	171.667	162	343.981	555.324
BC030183	0.683333	0.6	1.03667	5.41667	5	3.98611	11	60.6667
BC030336	4.4	4.28	3.60667	4.13667	176.667	159	210.333	254.333
BC031181	24.1267	21.9725	27.8033	24.5467	215	181.5	360	335.324
BC031353	13.2	11.4225	7.74	6.08333	426.324	342.743	362.981	301.324
BC031781	6.07667	6.265	6.76667	6.19	164.667	157.75	266.324	257.324
BC031853	7.50667	8.49	10.42	9.25667	160.333	168	322.333	302.667
BC032203	3.84	4.18	4.57333	3.94333	202.991	204.75	350.657	319.324
BC032204	2.71333	2.7625	5.39667	9.55	57	53.25	164.315	307.296
BC032265	3.49333	3.465	4.86333	4.39	58.6667	54	118.667	113
BC033915	20.3667	23.3425	29.6467	27.2533	897.296	951.701	1893.62	1839.94
BC034076	5.66333	5.5725	6.84	7.33	138.333	125.5	243	273.981
BC034090	12.3033	14.2825	13.12	16.1267	478.333	513.729	740.315	960.657
BC035295	2.27	2.11	1.47	1.63333	79.6667	68.5	75	88
BC037034	3.33333	2.9625	2.6	3.98667	55	45.25	62.3333	100.667
BC037112	6.34667	6.7925	8.64667	9.54333	247	244.736	488.315	569.667
BC037393	3.39667	3.01	2.81667	3.42667	110.981	91.2431	133.667	171.667
BC038156	3.79	3.725	2.47667	1.81	120.333	109.75	114.333	88.3333
BC038286	11.5833	13.5025	14.5533	18.6933	251.954	271.986	458.972	623.917
BC038822	1.75	1.7975	1.96667	2.14333	32.3333	30.75	52.6667	60.6667
BC039093	6.49	7.22	11.05	12.94	159.333	163.5	393.333	486.667
BC043098	18.7233	16.1775	18.1167	22.02	786.657	630.25	1105.67	1419.67
BC043118	14.25	16.32	17.14	15.2	609.648	646.986	1062.31	996.278
BC046331	15.5767	15.9575	17.3133	17.61	434.306	412.958	700	752.63
BC046404	2.68	3.625	3.06	4.37	45.3241	56.75	75	113.333
BC049349	2.39333	1.845	1.40667	1.01333	54.6667	38.75	46.6667	35.6667
BC049816	1.33333	1.3725	1.30667	5.54667	20.6667	19.7431	29.3333	132.667
BC050078	2.90333	2.44	2.02	1.49	84.3333	65.5	85	66.3333
BC050254	5.72333	5.4225	5.04333	4.03333	124	108.75	158.667	134
BC051227	13.32	14.455	16.0433	19.2333	108.333	108.75	189.333	239.333
BC052328	1.26	1.0375	1.48	3.19333	17	13	29	66.3333
BC053749	1.65333	2.36	1.72333	1.67333	34.6667	45.9931	52.6667	54
BC054438	32.3333	29.26	24.0133	21.9967	489.667	410	527.667	510
BC055107	7.15667	3.7125	1.29667	0.8	192	92.5	50.6574	32.6667
BC056474	17.9933	18.93	14.66	16.1	106.981	103.972	126.657	147
BC057079	5.04	4.9275	4.33	3.87333	248.648	225.25	309.981	292.602
BC057170	4.98333	8.22	4.89333	9.26667	115	170.243	164	325.324
BC057552	5.22667	6.1	6.40333	8.14333	102.991	110.743	182.972	245.278
BC057627	10.67	11.6725	13.3567	14.7267	331.657	337	601.63	701.315
BC057893	5.35667	5.7675	5.25333	5.62	111.333	111	158	178.667
BC059842	3.54333	3.87	4.42	4.18	317.657	321.458	576.231	574.639
BC060631	8.04667	9.375	10.2267	10.57	333	358.993	612.667	671
BC060632	12.2267	10.15	18.43	23.4	489.981	376.986	1071.31	1438.3
BC062109	3.69667	3.47	3.86667	2.64667	97	83.9722	147.667	106.315
BC063749	7.41333	9.685	9.77333	10.8033	237.333	287.5	453.667	530.667
BC066107	2.02	1.785	1.8	1.55667	89.6667	73.5	115.667	105.667
BC067047	3.00667	2.32	5.45	11.11	167	119.243	438.315	947.667
BC067074	1.93	1.4325	2.02667	1.68333	134	91.75	204.333	178.667
BC068281	2.26	2.28	1.89	1.94	55.6667	52.25	67.6667	73.3333
BC072620	4.71333	4.985	7.9	4.82333	137.667	134.5	333.667	215.667
BC087945	16.6367	16.2125	13.4633	22.6767	154.657	139.5	181.667	323.306
BC088983	3.5	4.205	2.90333	2.76333	41.6667	46.2431	50.3333	50.3333
Bcam	161.283	152.49	222.847	219.317	3305.54	2888.92	6616.63	6886.59
Bcap29	15.2333	12.4175	8.04667	6.14667	253.991	191.986	194.667	156.657
Bcap31	35.83	33.295	37.5233	41.86	369.963	317.986	562.296	663.306
Bcar1	10.21	9.675	16.7667	21.3967	273	240	649.991	878
Bcar3	2.75667	2.325	2.90667	2.60333	76.3333	59.75	117	110.333
Bcas2	28.3733	26.3825	28.6267	24.88	343.25	295.729	503.556	461.278
Bcas3	10.7467	10.555	10.3167	8.99	329.324	299.75	457.667	422
Bcat2	88.9333	105.082	81.34	60.1533	1180.25	1287.71	1568.6	1222.97
Bccip	39.89	38.8125	60.6	60.7833	350.657	315.986	772.333	817.991
Bche	4.24667	3.63	2.35	2.39667	224.333	178.243	180.333	193.639
Bckdha	253.99	289.568	207.21	104.207	3578.45	3778.31	4242.76	2245.9
Bckdhb	38.8967	39.985	28.1	13.2833	462.63	440.951	485.306	242
Bckdk	48.9	48.3425	44.6267	35.8233	1189.53	1089.02	1573.49	1333.88
Bcl10	8.70333	7.995	6.91667	7.75667	130.333	111.25	150.333	177.657
Bcl2	1.87	1.49	1.93333	3.3	106.333	78.75	159.333	288
Bcl2l1	37.7	21.91	21.24	23.7633	761.667	409.25	621.667	734.333
Bcl2l11	4.09667	4.75	5.17333	3.37667	169.657	182.75	311.324	214.667
Bcl2l12	5.4	6.295	7.89333	6.36333	49.3333	53.25	104.657	89
Bcl2l13	17.6933	16.2025	18.7667	16.3133	1044.29	884.729	1605.92	1474.62
Bcl2l2	22.5033	23.73	20.9733	18.66	663	646.993	897	842.657
Bcl3	1.96667	2.045	4.76	8.12	30	28.75	105.333	190.333
Bcl6	12.8867	11.3975	8.64667	10.4	360.324	296.972	349.657	444.306
Bcl6b	6.61	6.6775	12.4033	15.7867	188	176.5	513	688.926
Bcl7a	6.75	6.7225	6.69667	4.79333	213.657	196.736	307.667	232.324
Bcl7b	24.4567	27.745	33.71	28.8733	155.667	163.243	310.991	281.315
Bcl7c	12.73	11.995	14.6933	16.5733	104.667	91	174.991	208.667
Bcl9	9.67333	8.005	12.27	8.94	383.333	294.243	704	541.333
Bcl9l	12.7267	11.5875	24.6167	22.24	578.333	487.5	1620.32	1550.98
Bclaf1	13.9767	11.72	9.03333	9.00667	648.333	503.236	608.667	640.333
Bcor	5.66333	6.4775	8.47333	7.95667	301.667	320.25	654	649.333
Bcorl1	1.80333	1.975	3.29667	3.39	94	95.5	249	271.333
Bcr	4.83	4.585	5.64	7.45667	187.648	165.236	317.62	444.269
Bcs1l	14.49	15.39	15.1033	14.2967	225.667	222.479	341.667	340.991
Bdh1	25.2367	47.0825	24.98	49.7	363.991	624.986	525.991	1097.33
Bdnf	1.10333	1.745	2.41667	1.47	51.6667	75.75	163.667	105.333
Bdp1	3.43	3.14	2.45	2.31333	289.333	245.493	300.324	299.333
Becn1	31.3	28.9475	28.5533	33.2533	425.315	364.736	563.333	692.296
Bend5	6.38333	6.1525	5.61	4.76667	79	70.4931	100.667	90.3333
Best3	3.24	3.1025	3.29	4.10667	74.9907	66.5	110.333	146
Bet1	5.4	5.8325	5.3	5.54333	67.3241	67.5	96	106
Bet1l	9.7	8.95	8.55	10.9433	116.333	98.75	148.667	201.315
Bgn	137.153	160.042	147.443	538.05	2772.98	2985.97	4323.99	16722.3
Bhlhb9	7.08667	5.49	7.02667	4.63333	131	93.75	188.667	131.333
Bhlhe40	24.35	19.895	27.83	30.8433	644.667	488.5	1069.33	1253.33
Bhlhe41	16.5633	17.5175	16.52	20.19	200.667	195.75	289.667	374.315
Bicc1	8.51667	7.985	13.0933	22.9733	225.639	195.972	501.972	933.972
Bicd2	41.72	43.8775	42.6167	40.3667	1608.32	1567.24	2383.66	2385.67
Bik	3.66	5.57	7.22667	5.01667	29.3333	41.5	84.3333	61.6667
Bin1	4.14667	3.505	6.22667	11.2933	86.6667	67.75	188.963	361.63
Bin2	0.813333	0.375	1.34	3.57667	11.3333	4.75	27	76
Bin3	4.83	5.4275	4.12667	6.72333	69.3333	72	85.9907	147.667
Birc2	8.80667	7.755	5.66	5.00667	235.315	191.493	219.324	204.667
Birc3	3.64333	3.2475	3.94667	4.42333	82.6574	68.25	129.991	153.667
Birc5	0.113333	0.165	0.453333	3.52333	3.33333	4.5	19	156.991
Birc6	8.96333	8.9225	7.93333	8.35	1236.59	1140.97	1587.59	1765.61
Bivm	2.79	2.6025	1.79333	1.88	84	72.5	78.3241	86.3333
Blcap	21.83	19.605	19.05	12.2167	386.333	322	489.667	331.333
Blmh	16.43	16.085	16.5267	18.7867	313.324	283.743	457.324	548.972
Bloc1s1	108.73	102.173	124.213	96.74	509	442.5	845	693.333
Bloc1s3	2.38667	3.5425	2.70667	3.22667	37.2778	51.25	61.3333	77.3056
Blvra	10.7133	9.875	9.07	9.79	106.667	91.25	131.324	148.991
Blvrb	16.31	15.8175	16.97	20.7467	119.991	107.75	181.333	233.991
Blzf1	5.68	5.4175	5.94667	5.23667	191	169.243	290	269.667
Bmi1	9.44667	9.565	10.1033	8.16333	288.963	270.986	448.259	382.315
Bmp1	12.4033	12.4325	12.83	26.7033	388.991	360.993	584.296	1286.31
Bmp10	65.45	67.425	88.16	56.27	703.667	666.25	1372	916
Bmp2k	1.51	1.505	1.29	2.25667	84.3333	78	104.667	193.333
Bmp4	4.44333	5.085	3.76333	5.78333	72	76.5	88.6667	143.667
Bmp6	14.29	16.435	14.5233	13.3733	293	310.743	431.991	419.981
Bmper	2.41667	1.765	2.16667	2.32667	78	53	101.333	115.333
Bmpr1a	18.4967	14.33	14.8	14.8233	862.657	619.25	1000.31	1059.98
Bmpr2	15.2933	14.1475	16.7433	17.6867	456.324	391.243	723.324	810.62
Bms1	10.3433	10.14	11.24	12.1167	377.333	342.972	595.333	676.972
Bmyc	10.6767	12.2975	11.26	11.8667	76.6667	81.75	117.333	130.667
Bnip1	16.5767	17.8	13.63	13.2233	151.333	150.25	180.667	184.991
Bnip2	45.2433	42.8475	37.73	38.4633	472.306	414.993	571.667	614.991
Bnip3	14.6333	14.6675	8.56333	7.45333	218.667	202.5	185.991	170.657
Bnip3l	7.39333	7	5.35333	5.60667	200.315	175.75	210.667	232.991
Boc	2.81	2.6175	2.83	3.9	106	91.25	154.657	225.324
Bod1	57.4567	58.9425	47.5033	43.5667	685.657	651.729	822.981	795.981
Bod1l	6.59	7.1975	4.91	4.05333	596.981	605.25	645.667	562
Bok	3.11667	3.3	3.99333	10.03	38	37.25	70.6667	187.333
Bola1	21.4933	22.14	21.13	16.3533	133.333	126.965	190.463	155.056
Bola2	52.03	52.29	69.51	76.0267	149.333	138.493	289.667	334.333
Bola3	93.5867	93.6775	71.76	56.1133	421.981	391.729	470.63	387.324
Bop1	12.1033	11.8325	15.6867	21.7867	255	230	479.667	703.981
Bpgm	11.8233	11.6375	14.0933	14.5167	208.333	189.5	359.667	392.333
Bphl	21.8767	20.96	12.85	8.86	224.991	199.75	192.333	139.667
Bpnt1	8.09	6.9075	9.4	9.47	150.333	118.743	253.333	269.657
Bptf	7.16667	6.9725	8.44333	8.60333	700	631.5	1196.67	1289.31
Braf	3.18667	2.7825	2.81	2.78333	139.667	113	178.648	187.333
Brap	11.4367	12.7575	10.79	11.7767	361.648	373.472	494.972	570.306
Brcc3	4.59667	4.5625	3.34	2.79667	165.556	152.243	174.426	154.056
Brd1	6.64333	6.995	6.83667	6.43667	265.667	260.243	397.63	395
Brd2	25.51	25.7375	29.3867	30.5533	813.944	758.729	1359.74	1494.55
Brd3	8.75667	8.5725	11.3767	12.8533	223.333	202.25	420.972	502.62
Brd4	11.7	11.645	22.23	25.73	619.287	569.986	1704.08	2090.42
Brd7	27.5	26.9025	27.6833	26.1067	546.324	495.229	798.639	793.991
Brd8	6.10333	6.9875	7.06667	7.12333	242.991	257.229	408.306	434.269
Brd9	15.0467	14.5675	11.5467	11.1567	308.306	276.479	343.287	350.278
Bre	18.4333	16.62	13.6733	16.5633	228.981	190.736	246.278	315.639
Brf1	13.3133	14.375	13.7933	12.6533	312.278	312.181	469.602	454.241
Brf2	4.53333	6.6975	5.58667	6.27333	53.3333	73	95.3333	113
Bri3	76.9033	76.5425	71.43	63.8233	591	544.75	798	751.667
Bri3bp	6.67333	5.85	8.24333	6.53333	396.981	322	711.667	594.667
Brix1	5.88667	5.51	4.94333	4.68	133	115.5	161.991	161.667
Brms1	11.9667	12.535	15.6667	15.6467	136.324	131.993	258.963	273.296
Brms1l	8.45	7.3275	5.47	5.96	152.991	122.75	143.991	165.324
Brp16	2.68333	3.6875	3.03667	2.90333	45.3333	57.5	74.3333	75
Brp44	266.503	269.785	196.367	137.443	1936.65	1814.24	2074.31	1528.66
Brp44l	73.3733	91.7225	32.9867	29.5733	566.185	655.889	369.917	349.556
Brpf1	7.22667	6.6825	8.57333	8.65667	273	233.5	469.62	500.657
Brpf3	4.07	3.9975	3.81333	4.36333	207	188	281.648	340.667
Brsk1	0.933333	1.255	1.55667	2.30667	17.8704	22.2292	43.3426	68.2685
Brwd1	5.97667	5.6	4.40333	3.84	416.269	362.66	445.611	410.583
Bscl2	12.3233	12.5825	13.54	15.79	170	160.743	270.991	333.972
Bsdc1	27.19	26.6675	26.1867	23.3833	615.991	560	860.657	811.972
Bsg	700.217	686.5	931.493	754.377	10440.8	9445.42	20148.5	17233.2
Bst2	30.6733	116.96	40.7333	119.157	200.667	673.743	386.991	1184.59
Btaf1	3.39333	3.155	2.14	2.22667	245.648	211.743	224.657	247
Btbd1	18.96	18.8225	13.84	11.4967	484	445.25	512.324	450
Btbd10	4.00667	3.3025	3.69	4.50333	87.3333	66.75	117	150.657
Btbd12	1.59	1.4025	1.56667	2.45667	77.3333	63.25	110.657	183.333
Btbd19	1.19	1.26	1.18	2.67	16.6667	16.25	24	57.3333
Btbd2	22.1	25.155	25.8133	21.2967	569.657	601.25	963.981	840.648
Btbd3	5.66333	5.03	3.56333	3.73333	246.333	203.25	225.667	248.657
Btbd6	11.7333	13.4775	14.1833	11.3667	206.333	219.75	362	306.667
Btbd7	7.85333	6.935	8.03	8.52333	287.657	235.25	426	478.991
Btbd9	4.35	4.6025	6.03333	6.86	71.6574	70.25	144	173.333
Btd	6.60333	6.275	7.74667	9.66667	108	95	183.667	242.333
Btf3	13.36	12.7425	7.83333	8.55667	124	109.25	105.333	121.667
Btf3l4	1.88667	2.035	1.29667	1.28667	49.9907	49.75	49.6574	52.3333
Btg1	6.10333	7.1625	7.81333	9.91667	93.3241	101.5	173	233
Btg2	14.4667	11.31	11.01	11.5533	379.657	274.5	420.611	463.907
Btnl9	14.4033	9.925	14.1333	13.3767	302.12	194.188	429.509	429.269
Btrc	10.6833	10.505	9.94	9.54667	205.648	187.25	277.667	281.667
Bub1b	0.506667	0.4625	1	6.28333	15.6667	13	44.6667	296.657
Bub3	17.4233	15.93	19.62	21.47	304.667	258.222	497.333	575.315
Bud13	3.90333	4.3975	5.21	5.83333	73.3333	76.75	141.991	168
Bud31	24.68	25.5275	22.9367	24.28	97.6481	93.3403	131.944	147.241
Bves	25.71	24.29	20.2667	19.5567	351.657	307.75	401.981	409.657
BY080835	34.48	39.205	18.5933	12.4833	335.667	353.75	263	185.667
Bysl	9.77667	9.7375	13.8	16.43	257.667	237.5	527.667	663
Bzw1	14.8333	13.5725	12.7333	16.66	347.324	294.5	432.991	598
Bzw2	86.0533	79.5675	58.8667	37.3467	1307.58	1120.69	1299.31	868.667
C030006K11Rik	38.67	48.215	34.3133	26.8033	561.333	649.243	723.991	596.324
C030044B11Rik	4.54333	4.0175	2.88	2.27667	60	49	55.3333	46
C030046E11Rik	5.56667	5.535	5.03	5.36333	297.657	274.736	389.963	439.324
C030046I01Rik	44.38	43.8325	52.6767	47.8967	688	629.243	1183.95	1137.98
C130039O16Rik	5.55	6.095	9.44667	9.65	171	174.25	421.648	455.648
C130074G19Rik	10.98	11.7975	14.5833	18.1767	266.667	265.5	513.333	676
C1d	5.76667	5.63	4.68	4.59333	144.981	131.25	170.648	177
C1galt1	5.33667	4.145	2.62667	3.04333	89	64.5	63.3333	77.6667
C1galt1c1	4.57667	5.265	2.53667	2.99333	57	60.4931	46	57
C1qa	39.6967	46.1	80.42	179.623	365.657	387.25	1072.33	2532
C1qb	44.4067	52.865	64.1467	150.663	401.333	434.75	839.667	2085.67
C1qbp	86.8867	90.1375	66.12	56.15	861.241	827.465	952.593	852.315
C1qc	39.01	50.1775	61.8667	137.697	350	410.5	804	1892.33
C1qtnf1	7.89667	6.725	11.3133	12.9367	169	133	350.333	423.667
C1qtnf2	3.67	3.695	5.13333	8.36333	36.6667	34	74.3333	128
C1qtnf3	0.0333333	0	0.02	2.85333	0.666667	0	0.666667	87
C1qtnf4	5.05667	4.9925	5.21	3.55	55.3333	50.5	83	59.6667
C1qtnf6	5.18667	3.5725	7.35	42.7467	103.333	65.75	212	1308
C1qtnf7	1.99667	1.865	1.71	2.19	65	56.25	81	109.667
C1qtnf9	28.1133	26.72	25.0167	19.5267	455	400	587	483
C1ra	2.94667	3.37	4.44667	5.49333	66.6667	70.5	145.667	190.333
C1s	9.83	8.47	7.06667	8.95	243.333	192.743	253.333	339.333
C2	0.586667	0.89	1.16	2.41333	13	17.75	37	81
C230052I12Rik	1.35333	1.2425	1.22	2.58333	19	16	25	55.6667
C230081A13Rik	5.52	4.9375	8.50667	11.62	182	150.75	405.991	587.333
C230096C10Rik	15.5567	14.8075	17.5867	16.7067	824.222	725.16	1351.57	1356.95
C2cd2	6.64667	5.77	5.27667	6.66333	167.667	134.75	193.324	257.611
C2cd2l	4.98667	5.2325	6.51	7.24	184	178.75	348.639	409.306
C2cd3	2.62	2.405	2.35	2.95667	174.296	148	226.324	300.972
C3	43.63	36.455	78.99	88.56	1855.32	1430.13	4854.05	5778.86
C330006A16Rik	44.86	44.4825	48.7033	39.6433	877.333	806.75	1381.67	1188.67
C330006K01Rik	3.11	4.0875	3	3.49667	101	122.743	141.667	173.991
C330016O10Rik	5.69	4.38	5.89667	11.07	118.667	84.75	178.667	354.333
C330018D20Rik	5.5	5.255	3.58333	3.03667	117.333	104	111	99
C3ar1	1.6	1.7025	2.99	8.44333	45.3333	44	122.306	366.648
C4b	4.33667	4.9625	6.24333	12.4533	198.324	205.986	411.611	871.222
C530028O21Rik	0.756667	0.36	0.826667	2.95	14.3333	6.25	22.6667	86
C5ar1	2.20667	3.145	4.64667	8.50333	46	60.5	140.667	272.667
C630004H02Rik	1.45	1.7075	1.85	2.56667	40	43.5	73.9907	108.333
C7	6.76333	3.8125	5.73667	4.40333	122.333	63.75	150.667	121.991
C77080	1.65	1.5775	2.16333	3.66	72.3333	64	137.667	246.667
C78339	8.93333	11.1025	11.8333	14.75	105	121	201.667	266
C80913	5.28333	5.3125	3.94	5.27	154.324	144	166.667	235.667
C85492	9.05333	9.605	10.0667	7.71333	178.333	175	287.667	233
C87436	4.35333	4.345	3.48667	3.06667	93	86	107.667	100.333
C920016K16Rik	2.76	2.87	1.96667	1.86	70.6667	68	73	73
Cab39	32.7233	31.71	30.4533	30.74	647	581.25	873	931.667
Cab39l	7.66333	6.67	5.92	6.27333	198	159.5	221.667	248.333
Cabc1	231.673	242.438	226.757	136.87	6876.5	6670.38	9759.16	6215.9
Cabin1	6.96667	6.8325	7.81	9.71333	442.657	401.25	719.648	944.972
Cables1	3.70667	3.8475	3.32667	3.93	97.6574	93.5	127.306	158.657
Cables2	4.16	4.0875	3.31333	3.26667	104.333	95	120.333	125.667
Cacna1c	46.0433	59.1725	52.65	46.0933	2550.07	3044.8	4231.96	3910.03
Cacna1g	5.21667	5.03	6.65	6.25333	338.324	302.493	625.296	622.287
Cacna1h	8.92	11.74	10.7667	7.07667	611.954	747.722	1070.27	741.648
Cacna1s	4.90333	3.725	4.75	1.74667	260.667	183.75	366.315	141.991
Cacna2d1	36.9267	32.2475	26.9067	22.9567	1211.86	983.09	1280.81	1155.86
Cacna2d2	4.91667	5.7075	4.37333	2.35333	229.972	246.236	296.315	167.667
Cacnb1	3.39333	3.125	4.57	9.18	62.3333	52.9861	121.667	258.657
Cacnb2	24.09	19.96	20.26	15.33	608.648	466	742.963	593.648
Cacnb3	1.45333	1.2575	2.11333	6.23333	38.6296	30.7292	81.3056	254.667
Cacng7	2.21333	2.39	3.51333	5.82333	41.6667	41.5	95.9907	168.333
Cacybp	21.2633	19.1625	17.1567	14.6333	261.648	218.215	306.63	275.315
Cad	4.34667	4.2375	7.59	9.74667	262.963	237.486	665.63	903.583
Cadm4	13.53	15.4925	17.56	14.9167	248.333	262.5	467.324	418.991
Calcoco1	79.3467	76.625	90.6867	57.4633	1832.3	1639.69	3039.45	2030.58
Calcrl	6.21333	5.23	3.27	5.08667	233.667	181.243	178	292.648
Cald1	16.7433	13.28	19.24	35.95	374.306	275.236	623.278	1231.96
Calhm2	3.51	3.035	2.9	4.95333	61	49	73	132
Calm1	59.8367	50.775	60.0667	84.0233	2037.6	1598.45	2964	4384.97
Calm2	38.3833	32.2275	47.6	59.63	361.593	281.208	651	861.324
Calm3	79.8433	82.38	109.217	136.4	1500.59	1433.88	2976.95	3929.77
Calr	156.113	119.793	216.563	236.45	2582	1824.75	5190	5996.33
Calr3	6.45667	6.0925	5.53333	2.82667	102.333	89.5	127.333	68.6667
Calu	99.3133	84.725	89.65	123.983	2876.66	2272.24	3765.99	5510.31
Camk1	50.3333	48.8175	45.6467	52.5333	588.315	528.479	773.981	941.639
Camk1d	1.75667	1.74	1.90333	2.59	106.333	97.25	167	240.333
Camk2a	15.7233	16.695	16.5467	10.3367	715.991	704.75	1093.67	720.315
Camk2b	6.69	5.82	5.95333	5.02333	227.333	182.736	293.648	261.667
Camk2d	42.24	40.1525	31.44	30.4967	1603.88	1410.9	1730.9	1773.53
Camk2g	21.1333	24.0175	20.5267	15.5933	666.287	702.438	937.556	752.62
Camk2n1	15.4033	17.245	14.8	11.5633	208.667	215.5	290.667	240
Camkk2	3.54	4.5625	4.43333	7.24333	80.3333	95.2361	146	251.657
Caml	8.15667	7.8825	7.89667	8.55667	96.3333	86	135.333	155
Camsap1	4.06333	4.17	4.71333	4.47333	273.991	259.743	460.657	461.981
Camsap1l1	5.75667	4.7525	5.76667	6.31333	383	294.25	556.667	643.981
Camta1	15.6067	16.6525	16.66	20.83	1118.3	1106.97	1730.91	2290.58
Camta2	19.1967	18.685	26.8567	24.6333	730.657	657.972	1483.28	1438.28
Cand1	5.90667	5.5175	5.96	7.34667	426.667	368.743	623	814.315
Cand2	45.0267	54.14	69.7733	70.6233	1820.33	2029.47	4085.9	4375.63
Cant1	12.95	12.6075	13.4267	15.5633	316.648	284.479	476	583
Canx	92.61	83.525	85.4533	77.4167	2913.95	2433.48	3898.63	3733.59
Cap1	23.4033	21.9475	23.9367	44.2733	477.333	413.243	707.667	1382.32
Cap2	58.7167	57.865	65.86	54.39	1704.6	1557.36	2771.15	2419.55
Capg	9.37667	9.55	16.6867	50.9	99.6481	93.7431	256.657	828.296
Capn1	13.6867	14.6775	19.1367	23.3233	349.944	347.438	708.537	913.806
Capn10	2.8	2.85	2.74667	3.62667	68.6667	64.5	97.6667	136
Capn2	37.28	33.72	44.2767	62.3633	1023.68	855.312	1761.76	2625.07
Capn5	1.22333	1.5175	1.8	3.11	46	52.25	98	179
Capn7	15.7467	14.54	10.8867	8.29667	477.648	408.493	478.657	384.963
Capns1	249.223	247.773	288.85	315.84	3033.8	2795.22	5102.66	5891.69
Caprin1	33.8	32.1125	37.7467	47.8	1161.96	1022.49	1880.94	2517.96
Caprin2	2.33	1.8125	1.40333	1.03333	70.6667	51.25	62	48
Capza2	59.47	52.445	36.04	33.7967	1003.65	819.493	882.62	874.639
Capzb	127.307	116.15	146.767	175.57	1895.31	1599.74	3169.97	4007.95
Car11	3.05333	4.0575	2.13333	3.53667	37.6667	46	38.3333	66.9907
Car14	82.1433	118.952	70.2633	52.15	847.944	1134.87	1052.87	824.546
Car3	6.85333	5.47	2.07667	3.02	90	66	39.6667	60.6574
Car4	20.1167	10.88	17.8067	16.26	205.667	103	264.667	254
Car7	3.14	3.14	2.79667	3.73333	41	37.7361	52.9907	74.6667
Car8	4.62333	4.41	3.74	4.46667	224.991	198.5	264.324	333
Card10	10.93	9.9	10.9067	11.27	439.667	368.986	636.972	694.602
Card6	2.01333	1.8375	2.27667	2.04667	77.6667	65.75	127.333	121
Carhsp1	9.50667	6.9925	8.67667	19.06	230.333	156.5	305	709
Carkd	26.1533	27.12	21.7	20.7967	294.296	283.236	354.657	358.63
Carm1	28.8567	33.065	35.7167	35.6433	575.324	610.986	1032.33	1089
Carns1	18.2967	19.3175	17.9933	9.24333	570.667	560.222	814.333	441.324
Cars	5.6	6.23	6.37667	8.12333	151.991	156.5	250.991	337.324
Cars2	18.28	20.67	18.18	12.44	348	364.243	503	362.657
Casc3	9.37667	9.2525	9.98667	9.77	314.333	287.729	487	502.667
Casc4	3.93333	3.02	2.78	3.26	120.324	85.75	123.333	152.667
Casd1	10.0967	8.565	7.78	5.95333	323.324	253	360.991	292
Cask	2.15667	1.985	1.81667	2.26333	151.667	128.743	185.333	243.667
Caskin2	25.78	20.795	33.0967	33.1433	1035.97	773.229	1928.96	2040.3
Casp12	2.67667	2.48	1.53667	4.1	58.6574	49.9931	49	137.333
Casp2	3.34333	2.9	2.56667	3.97	98.6667	79.25	109.667	179.324
Casp3	1.35667	1.5375	1.86	5.64667	17	17.75	33.6667	108
Casp6	6.94	7.315	6.23	5.46	74.6667	73	97.3333	90
Casp7	4.48	4.94	4.7	8.15333	89.6667	90.75	136.667	249.333
Casp8	2.54333	2.5125	2.75333	5.33667	59.9907	54.7361	94.3148	192.972
Casp9	4.64333	5.825	3.93667	3.99333	150.324	174.75	184.657	197.991
Casq1	8.69333	4.2325	15.48	19.0033	101.657	45.75	262.648	340.972
Casq2	409.767	356.203	443.08	499.633	7217.55	5812.43	11317.1	13489
Cast	39.26	36.655	39.9333	44.93	966.981	837.451	1425.92	1695.25
Casz1	11.1233	12.545	20.1533	18.7433	388.944	406.535	1020.17	1003.96
Cat	114.743	94.4475	82.28	64.4433	2363.31	1799.24	2458.67	2030.31
Cav1	108.283	92.6925	90.5467	136.077	2291.67	1816.75	2778.33	4407.33
Cav2	21.3133	18.35	11.2233	13.6333	448.333	357.75	342.333	438.657
Cav3	50.0733	49.7625	57.6533	68.6133	495	455.25	827.333	1038.33
Cbara1	8.90333	8.03	8.66333	11.3967	172.333	143.5	243	338.333
Cbfa2t2	3.45667	3.59	2.7	2.99667	177.667	171.25	201.667	236.667
Cbfa2t3	8.58667	8.4575	12.3733	11.16	194.657	177.479	407.333	387.991
Cbfb	8.16333	7.5175	8.56333	12.9867	200	171	304.667	487.991
Cbl	2.93	2.765	3.28667	4.17333	126.657	111	206	276.648
Cblb	3.20333	2.8675	3.36333	3.06	172.657	143.25	262	252.333
Cbll1	4.9	4.92	7.36667	7.92667	77.6667	72	169	192.667
Cbr1	20.65	22.54	15.4067	10.7333	190	191.75	206	151.333
Cbr2	17.34	19.55	21.9933	33.4667	143.324	148.493	263.972	423.296
Cbr3	2.08333	2.0375	2.46333	3.38	20.6667	18.5	35.3333	51.3241
Cbr4	27.4333	29.8925	18.1467	13.1433	244.333	246.75	235	179.324
Cbwd1	5.76	4.6375	4.75333	4.55333	67.3241	50.2361	80.6574	81.6667
Cbx1	11.23	11.525	13.0733	13.5833	121.667	115.75	205.657	225.667
Cbx2	1.37	1.75	2.08	1.98667	43.6574	51.5	95.9907	97
Cbx4	4.19	5.0925	6.94667	7.48333	89.6667	101.25	215.333	245.667
Cbx5	10.86	9.14	8.68667	10.9767	821	639	953.333	1271.66
Cbx6	12.3467	12.1575	14.04	21.8933	503.667	458.75	829.667	1368
Cbx7	13.1267	13.08	10.4367	4.97667	323.333	298.75	373.333	187.333
Cbx8	2.58667	3.43	3.42	3.55	30.6667	37.75	58.6667	64.6667
Cby1	11.23	11.0775	11.3833	11.1533	106.981	97.7292	157.667	162.648
Cc2d1a	6.06333	7.1975	9.69333	11.1067	169.657	186.493	393.593	476.306
Cc2d1b	7.69667	7.8375	9.16	10.01	215.324	202.743	371.63	429.296
Cc2d2a	3.56333	3.5175	3.07667	2.6	163.324	150.25	204.648	182.963
Ccar1	10.8667	10.4725	9.75333	11.03	354.287	315.722	461.972	550.991
Ccbe1	2.96333	2.4375	1.56667	0.936667	144.667	110.75	111	70
Ccbl1	18.8	22.5725	16.07	10.9633	307.981	342.729	382.306	275
Ccbl2	14.3567	15.765	8.22667	3.57333	274.333	279.5	228.667	104.333
Ccdc101	9.93333	10.5725	11.18	9.08	93.3333	91.7431	152.296	130.333
Ccdc102a	4.21333	4.175	5.51667	7.46	81	74.5	153.667	220
Ccdc104	7.83667	5.855	5.10333	5.61	101.667	70.4931	96	111.333
Ccdc109a	6.70667	6.6375	6.69667	5.81667	61.6667	56.5	89.3333	82
Ccdc109b	1.62333	1.2775	1.67	3.24	18	13	26.6667	55
Ccdc115	5.57333	5.485	4.72667	4.66667	80.6574	73.5	99.3333	103.333
Ccdc117	10.13	10.8325	8.61667	6.34	287.667	285	355.667	276
Ccdc12	21.34	21.5575	19.3333	18.0867	141.981	132.972	186.593	184.324
Ccdc123	5.67667	6.125	6.07	7.96667	123.991	123.729	192.657	266.62
Ccdc124	47.3567	56.7775	78.3967	73.86	367	406.75	882.296	877.657
Ccdc127	8.09667	7.87	6.09	6.19667	227	204.75	247.667	266.333
Ccdc130	2.87333	3.305	2.95333	3.25333	51.3333	54.7361	76.6667	88.9907
Ccdc132	5.68333	5.3775	4.11333	3.92	171.315	150.493	179.62	180.981
Ccdc134	2.62	3.5525	2.47	2.27	45.6667	57	62.3241	60.6667
Ccdc136	1.13	1.045	1.06667	2.43667	37.6667	32.25	51.6667	125
Ccdc137	2.69667	3.3125	1.48333	1.75333	62.6667	71.25	49.9907	62.3333
Ccdc141	31.0567	29.745	23.2367	13.9833	705.324	628.486	765.667	485.667
Ccdc157	3.35	3.125	2.05	2.63667	144.667	125	129	175
Ccdc21	13.63	15.5525	13.89	11.4567	443.944	469.472	656.963	571.62
Ccdc22	6.66333	6.375	6.84333	6.95	94.5093	83.6389	140.917	151.167
Ccdc23	14.2833	15.175	17.7367	22.2833	80.3333	78.9931	144.667	191.667
Ccdc25	11.7367	10.67	10.04	10.05	222.667	187.243	275.657	291.324
Ccdc28a	9.5	9.2925	4.61667	3.05667	94.3333	85.25	66.6667	46.3056
Ccdc28b	11.13	10.7875	9.54667	10.0967	79.6296	71.25	99.3333	110.639
Ccdc3	2.3	1.9975	1.73333	1.91	52	42	57	66
Ccdc32	7.11667	6.7425	6.73	6.90333	88	77.25	120.667	131
Ccdc34	2.86333	2.92	2.93	4.74	33.6667	31.75	50	85.3333
Ccdc41	5.43	4.7575	4.50667	4.71667	138	111.5	166.324	183.648
Ccdc43	6.82667	6.3	5.92333	5.45333	134	114.5	168.667	163.991
Ccdc45	3.01667	2.725	2.07333	1.83667	68.6667	57.5	68.6574	63.9907
Ccdc47	33.6333	29.5375	28.6633	24.5267	936.62	760	1156.6	1044.3
Ccdc50	5.67667	5.1025	4.35333	6.45	173	143.993	192.324	300.954
Ccdc51	6.14333	6.0275	4.69	4.57667	76.6667	69.75	85	87.3333
Ccdc52	2.24667	2.24	1.28333	1.07	79.9907	73.7361	66.3333	58.3333
Ccdc53	14.9433	14.4525	10.0367	9.82667	133.667	119.75	130.648	134.667
Ccdc55	5.20333	4.9325	5.32333	5.96	137.991	121.25	204.657	241.667
Ccdc56	72.98	69.32	65.29	65.1233	445.991	391.5	579.333	609
Ccdc58	6.03667	7.1525	6.99333	5.89	54.6481	59.9722	91.9907	81.6574
Ccdc59	8.31667	9.7475	6.90333	6.9	76.3333	82.5	92	97
Ccdc6	7.99667	8.72	8.80333	11.0967	375.333	378.243	599.657	797.981
Ccdc61	5.47	5.7075	5.98333	5.71333	93.6389	90.4861	148.657	149.991
Ccdc63	1.30667	3.1325	1.45	7.23	25.3333	56.25	41	215.333
Ccdc66	4.59333	4.2275	3.52	2.68333	115.324	98.2292	128.324	102.991
Ccdc69	3.92	3.305	4.53	3.95667	47.3333	37	79.6667	73
Ccdc71	8.7	8.7625	11.0633	11.43	193.028	179.736	356.241	388.88
Ccdc72	4.42	4.7575	5.84333	6.77667	24	24	46	56.3333
Ccdc75	3.78	3.4225	3.16	2.78333	132.981	111.729	161.657	150
Ccdc77	2.22333	2.4	1.37667	1.83	41	41	37	51.6667
Ccdc80	35.8333	35.5325	44.81	80.1467	1113	1017.22	2015.65	3817.63
Ccdc85a	6.65	6.4125	5.78	4.98	130.324	116.25	164.333	149.333
Ccdc85b	39.2667	39.36	31.2	34.2167	338	314	390	450.667
Ccdc85c	14.0433	16.5075	19.9167	16.69	184.981	200.993	380.296	336.324
Ccdc86	5.52	5.555	4.91333	7.38333	82.3333	76.75	106.333	168.667
Ccdc88b	0.74	0.695	1.45	3.49333	31.3241	27	88.3333	225.324
Ccdc88c	3.11667	3.045	3.75667	5.37667	166.667	152	292	440.657
Ccdc9	12.49	14.1975	18.5833	17.1567	210.324	222.25	454.324	442.991
Ccdc90a	25.8167	30.2875	24.91	21.5633	372.648	405.25	521.333	476.667
Ccdc90b	20.6367	16.8925	13.6367	9.5	213	161.25	204.315	150
Ccdc91	14.4333	14.91	14.8967	11.97	278.731	265.979	417.37	353.954
Ccdc93	3.28333	3.1875	3.16667	3.76667	85.9815	77.4931	120.333	151
Ccdc94	3.07	4.5	4.69	4.93	43.3333	58.75	95.6667	106.333
Ccdc97	23.18	25.78	36.3367	31.6033	589.333	606.25	1339	1230.32
Cchcr1	1.87333	1.96	2.35	4.20333	43.6667	41.75	79.6667	150
Ccl2	1.65333	2.615	3.30667	7.78333	11.3333	16.25	32.6574	81.6574
Ccl5	4.59667	1.195	13.94	37.9233	20	4.75	87.6574	251.667
Ccl6	8.02667	7.2	7.98667	13.53	98	80.25	141.667	253
Ccl8	1.65	1.565	1.53	8.45667	7	6	9.33333	54.9907
Ccl9	2.2	1.875	1.74	3.24333	56.3148	43.75	64.6667	127.296
Ccm2	14.5967	14.8875	16.7033	20.7767	222.324	209.236	369	484.991
Ccna2	0.413333	0.4625	1.04667	7.26	8.33333	8.75	30.6667	224.954
Ccnb2	0.23	0.3525	0.756667	7.37667	3	4.25	14.3333	148
Ccnc	2.00667	1.985	1.21667	1.58667	57.3333	52.75	50.3333	69.6667
Ccnd1	27.0933	23.6575	31.99	73.7933	875.648	705.243	1498.66	3650.29
Ccnd2	33.5333	30.345	40.0133	52.15	1646	1376	2844.66	3922.66
Ccnd3	20.5567	18.975	25.6467	37.8133	395.333	337	716	1115.33
Ccndbp1	15.8633	17.2725	15.7867	15.0533	212.278	213.986	306.306	308.648
Ccne1	0.58	0.75	0.68	2.07667	9.66667	11.5	16.3333	52.9907
Ccnf	0.136667	0.24	0.4	3.01	4.33333	6.99306	18.3333	146
Ccng1	225.527	230.075	170.313	146.323	6691.58	6329.67	7329.54	6656.57
Ccng2	6.73333	6.5175	5.53	4.72333	160.333	143.743	191	172.667
Ccnh	9.45333	8.56	7.25	4.84667	159	133.243	177	124.657
Ccni	29.63	25.4625	25.16	23.4633	588	469.243	723.648	713.991
Ccnj	2.33333	2.1125	1.87667	1.57667	70.0926	58.75	82	72.8148
Ccnk	15.35	15.5525	22.42	22.3033	318.981	299.243	674.639	710.306
Ccnl1	10.25	7.9875	5.19	5.1	186.991	134.993	137.991	142.657
Ccnl2	27.73	23.79	14.2033	11.3333	576	456.736	430	360.639
Ccnt1	6.87	5.335	7.27	7.64	127	91.5	195.333	216.657
Ccnt2	11.5033	11.0975	7.91	6.48	343.657	307.25	343.667	296.667
Ccny	31.1533	26.28	23.0067	24.54	1064.96	830.743	1140.62	1285.31
Ccpg1	41.7767	38.35	35.7	27.2233	805.75	685.451	999.824	804.981
Ccr2	0.846667	0.4175	0.983333	3.01333	21.6667	9.75	36.3241	118.333
Ccr5	0.663333	0.8	2.21333	4.79667	16.3333	18	78.6667	181
Ccrl1	3.12333	3.3075	2.41667	5.78667	54.3333	53	61	154.296
Ccrl2	9.57333	10.125	7.25	5.67333	171.667	167.465	188.667	155.593
Ccrn4l	20.1533	12.315	6.97	5.95	512.991	290.25	257.667	232
Ccs	18.7433	21.205	18.2733	18.1133	168.62	176.465	238.639	249.981
Cct2	60.08	58.53	58.15	62.39	1003.27	903.715	1408.89	1596.2
Cct3	52.74	48.0775	54.66	58.9	878.611	741.465	1321.24	1502.87
Cct4	59.73	58.565	48.9033	46.67	999.611	907.465	1186.23	1196.19
Cct5	81.05	72.4625	69.5	72.33	1220.45	1009.14	1516.84	1667.54
Cct6a	42.0233	35.7325	32.95	33.9467	453.333	356.458	515.657	561.324
Cct7	84.4733	78.6575	95.6333	90.3767	1351.64	1162.49	2217.96	2213.65
Cct8	57.9033	51.315	48.11	52.49	1084.31	888.708	1306.92	1506.85
Cd109	0.826667	0.8125	0.873333	4.34667	39.6667	35.9931	60.6667	319.611
Cd14	3.34667	3.4525	4.02	7.28667	42.6667	40.5	74	142
Cd151	133.177	126.933	136.353	175.817	2066.31	1818.72	3070	4180.62
Cd163	8.85333	6.6175	8.22667	6.96667	331.926	229.75	446.935	399.852
Cd164	48.61	45.0225	29.9133	29.65	1170.91	1002.39	1045.64	1093.94
Cd180	0.373333	0.4775	0.576667	2.06333	7.33333	8.5	16.3333	62.3333
Cd200	21.54	29.4425	11.74	12.1067	430.333	543.486	340.333	370.667
Cd248	5.59333	5.845	14.47	39.5033	122	117.25	458.333	1323.67
Cd274	3.59	10.41	5.74	8.48	110.667	284.25	255.333	395.324
Cd276	2.43667	2.7975	4.05	11.89	66.3333	70.5	159.667	497.324
Cd2ap	3.32667	3.145	2.37333	2.44667	152.657	133.493	158.324	172
Cd2bp2	11.22	12.075	11.7833	12.9367	313.667	312.236	477.657	553.639
Cd300ld	1.65333	2.075	1.93	3.64	34.3333	39.75	57.9907	115.667
Cd300lg	54.47	38.8275	52.94	44.89	1072.33	705.743	1508.63	1350.96
Cd302	8.63	7.7225	4.5	7.27667	92.3241	76.5	70	119.333
Cd320	7.82333	7.895	5.45	4.91333	147	137.243	148.667	141.667
Cd33	1.31667	1.305	1.48333	2.13333	20.9907	19.2361	34.3333	52.6667
Cd34	48.4733	44.39	51.68	104.453	975.324	826.215	1509.98	3221.29
Cd36	477.997	312.392	365.54	250.807	12270.9	7426.11	13604.1	9848.44
Cd37	1.76	2.0575	2.78	5.54333	18.3333	20	42	88.6574
Cd38	3.52333	3.39	3.15667	4.24333	89	79.2431	116	164.324
Cd3e	0.383333	0.07	1.17667	2.91	4.66667	0.75	20.6667	54.3333
Cd3eap	5.39	6.66	6.86	8.27333	61.6574	70.75	113.667	144.667
Cd3g	0.693333	0.11	1.66667	4.37	5.33333	0.75	18.3333	50.9815
Cd4	0.453333	0.3175	1.01667	2.01333	12	7.75	38.6667	81
Cd40	1.23667	1.2525	1.22	3.01	17.6389	16.5	25.3333	65.9815
Cd44	2.37667	1.67	3.68667	7.85333	114.324	73.9931	256.639	578.278
Cd47	23.6733	24.45	21.26	23.76	386.602	367.479	503.269	593.667
Cd48	1.61	1.775	2.08667	4.12333	15.6667	15.75	29.3148	61.3333
Cd52	5.5	6.3175	10.5167	27.0467	23	23.75	63.3333	172.667
Cd53	2.59667	2.6225	2.83667	5.58333	36	33.25	57	118.667
Cd55	2.47667	1.76	1.67667	2.82667	53.3148	34.7361	52.3241	93.3333
Cd59a	34.3333	29.3625	25.1233	17.3533	477.324	377.75	506.991	369.667
Cd63	39.5633	41.18	38.6333	68.89	349.315	336.736	494.324	932.991
Cd68	6.44333	8.3375	12.61	34.58	55.3333	65	156.667	454.991
Cd72	1.32667	2.31	2.64	14.1633	12.4537	19.2639	35.787	203.87
Cd74	128.69	58.26	186.363	270.72	1549.9	642.965	3242.86	5002.03
Cd81	268.563	240.372	266.847	332.223	3284.69	2716.36	4734.44	6228.06
Cd82	9.3	8.0525	12.18	14.7633	143.981	115	273	349.648
Cd83	2.06667	1.9225	1.8	2.51667	36	31	45.6667	67
Cd8a	0.413333	0.08	0.783333	2.06667	11	2	30	83.9907
Cd8b1	0.276667	0.07	1.26667	2.81667	3.33333	0.75	22	51.6667
Cd9	25.8033	22.0175	17.4033	25.2967	261.63	205.736	256.657	393.296
Cd93	19.46	16.8	24.34	54.85	1099	879	1993.33	4747.67
Cd97	28.38	24.2925	26.31	32.5167	723.62	572.715	974.648	1270.28
Cd99l2	33.95	33.7075	30.1333	30.97	958.333	880.493	1233	1339.67
Cdadc1	15.37	17.855	14.1933	10.6233	287.954	310.701	386.565	305.611
Cdan1	3.32	3.32	3.02	2.67	180.315	167.243	238	222.333
Cdc123	28.14	27.415	30.8767	23.8667	388.556	350.396	618.611	504.657
Cdc14b	2.94333	3.405	2.10333	1.89333	75.3333	80.9931	77.9907	74.3333
Cdc16	17.35	15.78	11.14	11.17	329.306	277.486	306.63	325.315
Cdc20	0.723333	0.59	1.67333	11.6667	10.3333	7.75	34.6667	254.667
Cdc23	11.5867	11.5525	10.52	9.99	297.657	275.486	392.315	392.972
Cdc25a	2.03	2.37	2.46333	2.85333	62.6667	67.75	110.333	135
Cdc25b	2.22333	1.89	3.17667	8.15333	55.3241	43.75	114.667	311.315
Cdc26	8.34333	7.5525	3.95	4.57333	56.3333	47.25	38.6481	47.3333
Cdc27	4.19667	4.1	3.72333	4.26667	206.324	186.743	265.657	321.972
Cdc34	80.01	88.825	96.63	93.24	861.991	886.493	1511.32	1538.67
Cdc37	70.6267	69.0175	105.277	97.3567	1476.57	1335.42	3193.89	3117.28
Cdc37l1	28.6133	27.3075	16.3967	12.6567	613	541.479	509.972	415.315
Cdc40	7.69	7.095	6.31667	5.71667	234.648	200.736	279.657	267
Cdc42	42.71	37.2675	35.13	48.0233	736.333	594.743	877.981	1269.67
Cdc42bpa	8.17333	7.225	6.92667	7.03667	575.62	472.458	707.296	759.602
Cdc42bpb	22.0867	21.1125	27.8733	34.7233	1194.27	1055.95	2184.85	2877.13
Cdc42bpg	7.53667	8.0125	8.79667	8.09667	354.315	349.479	600.315	583.981
Cdc42ep1	23.4067	21.9425	23.4533	32.51	482.435	418.521	701.426	1026.65
Cdc42ep2	11.34	9.8925	9.80667	10.8	139.333	112.5	175	203
Cdc42ep3	12.8233	13.09	12.4833	9.13667	214.667	203	303	234.333
Cdc42ep4	11.1267	8.32	6.55	8.81	322.667	223.25	275.667	391
Cdc42ep5	4.69	3.9425	5.23	8.06	34.6667	27	56	91.3333
Cdc42se1	9.47667	9.13	13.2067	21.4867	79.6667	70.9931	160.991	277.333
Cdc42se2	13.1867	12.3325	11.4367	14.2233	334.981	289.75	420.667	553.278
Cdc45	1.79667	1.43	1.47	3.40667	32.6667	23.9931	38.6574	94.9815
Cdc5l	7.03333	6.48	6.00667	5.65	179.315	153.243	221.981	220.62
Cdc73	9.3	9.16	10.41	10.3433	211.991	193.486	343.62	361.62
Cdca3	0.356667	0.45	0.873333	6.66	4.33333	5	15.3333	123.667
Cdca4	3.11333	3.1025	4.08	7.19	64	59	122	226.667
Cdca5	0.143333	0.1525	0.373333	2.25333	2.33333	2.25	8.66667	56
Cdca8	0.39	0.34	0.74	6.12333	5.33333	4.25	14.6667	128.657
Cdh11	2.33	2.39	2.18333	4.95	83.6667	79.5	113.657	272.648
Cdh13	84.0033	76.9425	74.5433	75.03	2660.24	2255.69	3423.23	3641.79
Cdh19	2.15333	2.425	0.963333	0.723333	56	58.5	36.3333	28.6667
Cdh2	68.96	64.9375	84.2467	72.21	2764.81	2416.65	4894.24	4433.91
Cdh23	1.95	2.225	1.86333	1.20333	175.333	186.25	242.657	165.944
Cdh5	76.7	68.915	100.433	152.943	2553.32	2123.74	4850.19	7796.87
Cdipt	22.4767	22.87	28.6433	42.2733	359.333	337.75	664	1035.66
Cdk1	0.123333	0.2025	0.536667	5.25333	3	4.39583	18.4444	190.481
Cdk10	5.66667	6.04	5.87667	4.69667	79.3333	78.25	119.667	101
Cdk11b	25.7367	24.7175	28.8	29.6633	566.991	503.486	921.324	1001.98
Cdk12	3.65667	3.22	3.47333	3.81667	150.324	123	207.333	240.657
Cdk13	6.10333	5.6775	5.09333	5.21333	374.648	323.493	453.667	491.333
Cdk14	1.90333	1.775	1.66667	2.84333	73	62.9931	93	167.639
Cdk16	59.6533	60.035	64.3167	64.5533	1544.31	1440.45	2417.32	2562.61
Cdk17	3.58333	3.4175	2.96333	3.63	89.6296	79.4722	107.546	139.333
Cdk18	12.6933	12.71	13.8433	10.8933	298.333	276.75	472.657	392.667
Cdk19	5.65	5.655	5.18	6.18333	191.333	177.25	253.972	320.667
Cdk2	4.41667	4.195	3.57667	4.68667	90	79	106	146.333
Cdk20	1.86333	2.3	2.17	2.39667	29	33.25	49	57
Cdk2ap2	21.27	24.03	19.8867	17.6467	165	172	224	209.333
Cdk4	29.47	28.5825	22.8667	33.9933	336.324	301.736	378.667	594.657
Cdk5	10.4967	9.6775	8.33	8.22	184	156.743	212.296	220.639
Cdk5rap1	8.63667	7.3875	7.08333	5.60333	144.972	114.743	172.657	143.667
Cdk5rap2	2.47	2.275	2.82333	5.09667	117.667	99.9861	195.333	372.981
Cdk5rap3	16.7267	17.545	19.7333	21.4333	266.981	259	456.287	524.602
Cdk6	2.22	1.83	2.63333	4.23667	46.6667	35.5	80.3333	136.333
Cdk7	9.61333	8.765	7.83	8.73	105.333	88.7431	124.648	146.639
Cdk8	4.42333	3.835	3.19667	3.66667	97.3241	77.9931	101.991	123.657
Cdk9	11.85	11.6425	11.82	11.8467	175	159.25	252.991	268.324
Cdkal1	5.45667	5.555	4.62333	3.73667	117.963	111	145	123.667
Cdkl1	7.44333	5.615	5.7	3.66	106.991	75	119	80.3333
Cdkn1a	14.45	7.4925	13.4767	38.9133	224.259	106.312	303.333	922.759
Cdkn1b	11.03	11.4975	11.13	8.14	289.333	279.25	423.667	327
Cdkn1c	14.65	13.2975	16.1367	6.40333	230.333	194	368.333	154
Cdkn2aip	3.43333	2.775	2.39	2.27667	98	73.5	99	100
Cdkn2aipnl	7.86333	7.7925	5.84333	8.83333	122.657	112.25	132	211
Cdkn2c	5.56333	5.7175	3.59333	7.49333	52.3333	50	49	108
Cdnf	9.95333	12.255	9.35333	6.27667	255.333	291.25	348.333	246.333
Cdon	2.45	2	4.23667	4.23667	81.3333	61.4861	203.972	215.981
Cdr2	4.96333	3.6725	4.95	8.76	101.991	69.9861	147.667	276.324
Cdr2l	2.16	2.145	2.99667	7.05667	68	62.5	137	340.667
Cds1	2.35	2.6275	1.95	2.34333	78.3333	80.9931	93.9907	119.667
Cds2	40	37.0225	37.1933	25.9567	2818.31	2416.23	3796.67	2799.99
Cdt1	0.873333	0.92	1.8	6.68	16.3333	15.7431	48.6667	190.991
Cdv3	12.06	13.005	8.67667	12.47	315.046	314.653	329.176	499.685
Cdyl	2.58333	2.125	2.53	3.10667	65.6574	49.75	92.9907	121
Cdyl2	1.28	1.285	1.80333	2.11	26.3333	24.25	53.6667	66.3333
Ceacam1	2.72667	2.3775	1.73	1.82333	86.6389	69.9722	79.6481	88.9444
Cebpa	4.42333	3.385	5.29667	8.78333	99.3333	70.25	172	302.667
Cebpb	68.3267	55.1825	25.5067	28.91	874.667	653.25	475.333	566.333
Cebpd	13.6333	12.0225	6.96	8.01667	225.333	184.25	167.333	203
Cebpg	6.87	6.0425	3.94667	4.93	250	203.5	208.667	274.333
Cebpz	7.29333	7.425	6.17667	5.08333	253	238.25	310.657	270.333
Cecr2	1.80667	2.2375	2.86667	1.56	141.667	163.25	325.991	187.333
Cecr5	15.91	16.6625	8.95667	6.39333	258.333	250.493	211.324	159
Celf1	25.12	23.7575	23.8567	20.9767	499.333	437.75	687.333	637.667
Celf2	8.49333	7.66	7.16667	7.92	640.981	534.729	783.981	916.315
Celsr1	2.82667	2.6275	3.73667	3.25333	266	229.222	508.315	468.648
Celsr2	1.54667	1.4175	2.10333	1.44667	136.991	116.299	269.88	196.065
Cenpa	20.9467	23.125	10.73	12.3133	238.333	244.243	177.648	214.657
Cenpb	98.26	103.512	129.07	144.857	2278	2220.75	4337.33	5147
Cenpf	7.11333	3.12	4.16333	3	671.667	271.5	569.333	434.333
Cenpm	0.323333	0.2375	0.976667	4.74333	3.33333	2.25	14.6667	75.3148
Cenpt	2.04333	1.915	1.51333	4.08333	30.6667	26.7431	33	94
Cenpv	13.6733	13.1575	7.54333	5.36333	120.991	107.479	96.6667	72.6667
Cep120	8.74	9.15	9.45	9.34667	338.667	328.993	530.981	555.324
Cep164	2.29333	2.77	2.41333	3.06667	121	135.493	184.991	248.324
Cep170	3.31333	2.8475	3.33333	3.88667	195.333	155.25	285.333	351.315
Cep250	3.46333	3.695	4.08	6.24333	221.667	219.25	378.667	611.991
Cep350	5.27667	5.1375	4.02667	3.91333	578.796	522.347	641.13	658.454
Cep57	4.41	4.2425	2.99333	3.03	92.6667	82.5	91.3241	97.6574
Cep63	13.5933	12.7875	12.7067	8.97	311.991	272.25	423	315.324
Cep68	13.2433	14.6875	14.5767	12.23	541.981	557.729	865.639	765.972
Cep76	2.01667	2.1925	1.81333	2.14	68.3333	68.75	89	111.333
Cept1	6.15667	4.9275	3.29333	3.55333	145.333	107.5	112.657	128.657
Cercam	2.03333	1.76	2.99667	11.1567	47	37.5	100.333	396.324
Cerk	13.3633	14.635	15.59	16.29	513.667	522.229	870.324	961.287
Ces3	73.2033	41.34	38.3667	9.88667	1224.58	638.958	931.306	251.991
Cetn2	12.5133	10.5125	9.28667	9.33667	126.324	98.25	136	144.324
Cetn3	19.8233	17.3625	15.4233	14.5667	170.907	138.444	192.935	192.306
Cfb	1.68333	2.48	2.53	11.3067	35	46.5	76	358.981
[truncated: 8,453 more rows]
